# Supplementary material
Source: publisher figshare collection journal article supplement (https://gsapubs.figshare.com/ndownloader/files/23306567)
Supplement: Supplementary file 1 [file 23306567]

## Sheet: Method
Methods DR1: NEVA Database 2017
The Northern European volcanic ash (NEVA) record originally compiled by Swindles et al. (2011) was updated and quality checked as of March 2017. Data are based on historical records of observed ash fallouts (which span only the last ~1000 years) and cryptotephra layers from sites in Northern Europe, which have been chemically characterised. Not all tephra layers recorded in Northern Europe are fr…
References
Chambers, F.M., Daniell, J.R.G., Hunt, J.B., Molloy, K., and O'Connell, M., 2004, Tephrostratigraphy of An Loch Mor, Inis Oirr, western Ireland: implications for Holocene tephrochronology in the northeastern Atlantic region: Holocene, v. 14(5), p. 703-720.
Jensen, B.J.L., et al., 2014, Transatlantic distribution of the Alaskan White River Ash: Geology, v. 42(10), p. 875-878. doi: 10.1130/G35945.1
Reilly, E. and Mitchell, F.J., 2015, Establishing chronologies for woodland small hollow and mor humus deposits using tephrochronology and radiocarbon dating: The Holocene, v. 25(2), p. 241-252.

## Sheet: Data Description
Table DR1: Holocene Northern European Volcanic Ash (NEVA) Database for Northern Europe
Last updated: March 2017
Chronology
Dates are given as reported in the papers and classified as:
H	Historically dated
R	Directly radiocarbon dated
I	Interpolated from age-depth model
W	Wiggle-match radiocarbon dated
A	Dated through association with another tephra layer
Tephras dated by other means are noted - e.g. 'GRIP Ice core'
All dates are provided in calibrated age ranges
A mid-point age in cal. BC (negative) or AD (positive) is illustrated and used for analysis
We acknowledge all the authors whose data we have used in this meta-analysis. Full references to their works are provided
Other workers are free to use the database for academic purposes, provided they cite this paper - any other use should be authorized by the corresponding author
We have tried to be as thorough as possible to include all suitably identified tephras in the compiled data set; any omissions are our oversights.
Worksheets
Cryptotephras		Contains information about each tephra layer (last 7000 years) including the site at which it was found, age, geochemistry and reference
Documented ash falls		Contains information about ash falls which have been observed and recorded in historical records
Last 1000 years		Contains a summary of all ash cloud events from historical records and cryptotephra records for the last 1000 years, during which time the frequency of ash clouds over northern Europe has not shown significant (95% sign. Level) deviation from stationary

## Sheet: Cryptotephras
Date of record input	Name	Equals	Reported date cal	Method	Mid age cal BC/AD	Mid age cal age BP (2000)	Mid age cal BP (1950)	Error (+/- yrs)	Source	Region	Site	Lat	Long	Site type	Geochemistry	Reference
2011	Hekla 1947		AD 1947	H	1947	53	3	0	Hekla	Ireland	All Saints	53.15	-7.9833	peatland	Dacitic-Andesitic	Cole and Mitchell (2003) The Holocene 13, 507-515
2011	Hekla 1947		AD 1947	H	1947	53	3	0	Hekla	Ireland	Ballygisheen	51.9667	-9.9	peatland	Dacitic-Andesitic	Cole and Mitchell (2003) The Holocene 13, 507-515
2012	Hekla 1947		AD 1947	H	1947	53	3	0	Hekla	Ireland	Ballynahone	54.7833	-6.63333	peatland	Dacitic-Andesitic	Pilcher et al. (1996) Journal of Quaternary Science 11, 485-494; Holmes (1998) A tephra-dated study of vegetation and climate change in the mid-Holocene of north-west Europe. PhD thesis, Queen's University Belfast; Hall and Pilcher (2002) The Holocene 12, 223-230; Swindles (unpublished data)
2012	Hekla 1947		AD 1947	H	1947	53	3	0	Hekla	Ireland	Black	54.6731	-7.01648	peatland	Dacitic-Andesitic	Rea et al. (2012) Journal of Quaternary Science 27, 425-431
2011	Hekla 1947		AD 1947	H	1947	53	3	0	Hekla	Ireland	Clara	53.02	-7.038	peatland	Dacitic-Andesitic	Hall and Pilcher (2002) The Holocene 12, 223-230
2015	Hekla 1947		AD 1947	H	1947	53	3	0	Hekla	Great Britain	Cors Fochno	52.504	-4.012	peatland	Dacitic-Andesitic	Watson (unpublished data)
2012	Hekla 1947		AD 1947	H	1947	53	3	0	Hekla	Ireland	Dead Island	54.8867	-6.5491	peatland	Dacitic-Andesitic	Swindles et al. (2010) Quaternary Science Reviews 29, 1577-1589; Swindles and Roe (2006) Quaternary Newsletter 110, 2-9; Swindles (2006) Reconstruction of Holocene climate change from peatlands in the North of Ireland. PhD thesis, Queen's University Belfast
2012	Hekla 1947		AD 1947	H	1947	53	3	0	Hekla	Ireland	Fallahogy	54.75	-6.6	peatland	Dacitic-Andesitic	Rea et al. (2012) Journal of Quaternary Science 27, 425-431; Watson et al. (2015) Quaternary Science Reviews 124, 248-264
2012	Hekla 1947		AD 1947	H	1947	53	3	0	Hekla	Ireland	Garron	55.0021	-6.06291	peatland	Dacitic-Andesitic	Rea (2012) Peatland records of recent (last c.250 years) climate change in the North of Ireland. PhD Thesis - Queens University Belfast
2012	Hekla 1947		AD 1947	H	1947	53	3	0	Hekla	Ireland	Garry Bog	55.0833	-6.5667	peatland	Dacitic-Andesitic	Hall and Pilcher (2002) The Holocene 12, 223-230; Holmes (1998) A tephra-dated study of vegetation and climate change in the mid-Holocene of north-west Europe. PhD thesis, Queen's University Belfast; Plunkett (1999) Environmental change in the Late Bronze Age in Ireland (1200-600 cal. BC). PhD thesis, Queen's University Belfast
2011	Hekla 1947		AD 1947	H	1947	53	3	0	Hekla	Ireland	Liffey Head	53.15	-6.2833	peatland	Dacitic-Andesitic	Cole and Mitchell (2003) The Holocene 13, 507-515
2012	Hekla 1947		AD 1947	H	1947	53	3	0	Hekla	Ireland	Lough Naman	54.439	-7.88516	peatland	Dacitic-Andesitic	Rea (2012) Peatland records of recent (last c.250 years) climate change in the North of Ireland. PhD Thesis - Queens University Belfast
2012	Hekla 1947		AD 1947	H	1947	53	3	0	Hekla	Ireland	Meenadoan	54.5939	-7.62328	peatland	Dacitic-Andesitic	Rea (2012) Peatland records of recent (last c.250 years) climate change in the North of Ireland. PhD Thesis - Queens University Belfast
2011	Hekla 1947		AD 1947	H	1947	53	3	0	Hekla	Great Britain	Mòine Mhór	56.51	-5.28	peatland	Dacitic-Andesitic	Housley et al. (2010) Journal of Archaeological Science 37, 577-593
2012	Hekla 1947		AD 1947	H	1947	53	3	0	Hekla	Ireland	Moneygal	54.7421	-7.63122	peatland	Dacitic-Andesitic	Rea (2012) Peatland records of recent (last c.250 years) climate change in the North of Ireland. PhD Thesis - Queens University Belfast
2011	Hekla 1947		AD 1947	H	1947	53	3	0	Hekla	Ireland	Mongan	53.3333	-7.9333	peatland	Dacitic-Andesitic	Hall and Mauquoy (2005) The Holocene 15, 1086-1093
2012	Hekla 1947		AD 1947	H	1947	53	3	0	Hekla	Ireland	Moninea	54.1419	-7.6496	peatland	Dacitic-Andesitic	Swindles and Roe (2006) Quaternary Newsletter 110, 2-9
2012	Hekla 1947		AD 1947	H	1947	53	3	0	Hekla	Ireland	Pettigoe	54.5334	-7.9853	peatland	Dacitic-Andesitic	Rea (2012) Peatland records of recent (last c.250 years) climate change in the North of Ireland. PhD Thesis - Queens University Belfast
2013	Hekla 1947		AD 1947	H	1947	53	3	0	Hekla	Great Britain	Roman Lode	51.1294	-3.78347	peatland	Dacitic-Andesitic	Matthews et al. (2008) Roman Lode, Exmoor, Devon: Tephrochronology Scientific Dating Report. Research Department Report Series English Heritage
2012	Hekla 1947		AD 1947	H	1947	53	3	0	Hekla	Ireland	Slieveanorra	55.0729	-6.2276	peatland	Dacitic-Andesitic	Swindles et al. (2010) Quaternary Science Reviews 29, 1577-1589; Swindles and Roe (2006) Quaternary Newsletter 110, 2-9; Swindles (2006) Reconstruction of Holocene climate change from peatlands in the North of Ireland. PhD thesis, Queen's University Belfast
2012	Hekla 1947		AD 1947	H	1947	53	3	0	Hekla	Ireland	Tattenamona	54.2761	-7.71676	peatland	Dacitic-Andesitic	Rea (2012) Peatland records of recent (last c.250 years) climate change in the North of Ireland. PhD Thesis - Queens University Belfast
2011	Askja 1875	= LBA-1	AD 1875	H	1875	125	75	0	Askja	Scandinavia	Borge	68.2467	13.7417	peatland	Rhyolitic	Pilcher et al. (2005) Boreas 34, 136-156
2015	Askja 1875		AD 1875	H	1875	125	75	0	Askja	Scandinavia	Degerö Stormyr	64.181	19.564	peatland	Rhyolitic	Watson et al. (2016) Quaternary Science Reviews 139, 110-128
2011	Askja 1875	= LBA-1	AD 1875	H	1875	125	75	0	Askja	Scandinavia	Fågelmossen	59.5333	12.1667	peatland	Rhyolitic	Wastegård et al. (2008) The Holocene 18, 539-549
2011	Askja 1875	= LBA-1	AD 1875	H	1875	125	75	0	Askja	Scandinavia	Getvaltjärnen	63.21	12.3	lake	Rhyolitic	Davies et al. (2007) Holocene 17, 319-330
2011	Askja 1875	= GRAM-1	AD 1875	H	1875	125	75	0	Askja	Germany	Grambow	53.5973	11.2773	peatland	Rhyolitic	van den Bogaard and Schmincke (2002) Journal of Quaternary Science 17, 3-20, van den Bogaard et al. (2002) Quaternary Research 57, 314-324
2011	Askja 1875	= LBA-1	AD 1875	H	1875	125	75	0	Askja	Scandinavia	Gullbergby	59.6406	18.4333	peatland	Rhyolitic	Wastegård (2005) Quaternary International 130, 49-62
2011	Askja 1875	= LBA-1	AD 1875	H	1875	125	75	0	Askja	Scandinavia	Källtorpmossen	59.3458	18.05	peatland	Rhyolitic	Boygle (2004) Journal of Quaternary Science 19, 103-109
2011	Askja 1875	= LBA-1	AD 1875	H	1875	125	75	0	Askja	Scandinavia	Klocka Bog	63.3083	12.4833	peatland	Rhyolitic	Bergman et al. (2004) Journal of Quaternary Science 19, 241-249
2011	Askja 1875	= LBA-1	AD 1875	H	1875	125	75	0	Askja	Scandinavia	Kortlandamossen	59.8458	12.2639	peatland	Rhyolitic	Boygle (2004) Journal of Quaternary Science 19, 103-109
2016	Askja 1875		AD 1875	H	1875	125	75	0	Askja	Poland	Lake Czechowskie	53.8735	18.2377	lake	Rhyolitic	Wulf et al. (2016) Quaternary Science Reviews 132, 1-14
2011	Askja 1875	= LBA-1	AD 1875	H	1875	125	75	0	Askja	Scandinavia	Lilla Backsjömyren	62.6856	14.5406	peatland	Rhyolitic	Wastegård et al. (2009) GFF 131, 293-297
2015	Askja 1875		AD 1875	H	1875	125	75	0	Askja	Poland	Linje	53.188	18.309	peatland	Rhyolitic	Watson (unpublished data)
2011	Askja 1875	= LBA-1	AD 1875	H	1875	125	75	0	Askja	Scandinavia	Spåime	63.12	12.32	lake	Rhyolitic	Davies et al. (2007) Holocene 17, 319-330
2011	Askja 1875	= LBA-1	AD 1875	H	1875	125	75	0	Askja	Scandinavia	Stor Åmyrân	63.733	20.01	peatland	Rhyolitic	Oldfield et al. (1997) Holocene 7, 283-290
2016	Askja 1875		AD 1875	H	1875	125	75	0	Askja	Germany	Tiefer See	53.5929	12.5289	lake	Rhyolitic	Wulf et al. (2016) Quaternary Science Reviews 132, 1-14
2011	Askja 1875	= LBA-1	AD 1875	H	1875	125	75	0	Askja	Scandinavia	Ulvåmossen	60.2056	12.6583	peatland	Rhyolitic	Boygle (2004) Journal of Quaternary Science 19, 103-109
2015	Hekla 1845		AD 1845	H	1845	155	105	0	Hekla	Great Britain	Cors Fochno	52.504	-4.012	peatland	Dacitic-Andesitic	Watson (unpublished data)
2011	Hekla 1845		AD 1845	H	1845	155	105	0	Hekla	Ireland	Fallahogy	54.75	-6.6	peatland	Dacitic-Andesitic	Watson et al. (2015) Quaternary Science Reviews 124, 248-264
2011	Hekla 1845		AD 1845	H	1845	155	105	0	Hekla	Ireland	Garron	55.0021	-6.06291	peatland	Dacitic-Andesitic	Rea (2012) Peatland records of recent (last c.250 years) climate change in the North of Ireland. PhD Thesis - Queens University Belfast
2011	Hekla 1845		AD 1845	H	1845	155	105	0	Hekla	Ireland	Garry Bog	55.0833	-6.5667	peatland	Dacitic-Andesitic	Hall and Pilcher (2002) The Holocene 12, 223-230; Holmes (1998) A tephra-dated study of vegetation and climate change in the mid-Holocene of north-west Europe. PhD thesis, Queen's University Belfast; Plunkett (1999) Environmental change in the Late Bronze Age in Ireland (1200-600 cal. BC). PhD thesis, Queen's University Belfast
2011	Hekla 1845		AD 1845	H	1845	155	105	0	Hekla	Faroes	Hovsdalur	61.5	-6.6833	peatland	Dacitic-Andesitic	Wastegård (2002) Journal of Quaternary Science 17, 723-730
2011	Hekla 1845		AD 1845	H	1845	155	105	0	Hekla	Ireland	Lough Naman	54.439	-7.88516	peatland	Dacitic-Andesitic	Rea (2012) Peatland records of recent (last c.250 years) climate change in the North of Ireland. PhD Thesis - Queens University Belfast
2011	Hekla 1845		AD 1845	H	1845	155	105	0	Hekla	Ireland	Meenadoan	54.5939	-7.62328	peatland	Dacitic-Andesitic	Rea (2012) Peatland records of recent (last c.250 years) climate change in the North of Ireland. PhD Thesis - Queens University Belfast
2011	Hekla 1845		AD 1845	H	1845	155	105	0	Hekla	Ireland	Pettigoe	54.5334	-7.9853	peatland	Dacitic-Andesitic	Rea (2012) Peatland records of recent (last c.250 years) climate change in the North of Ireland. PhD Thesis - Queens University Belfast
2015	BRACSH-1		AD 1728-1880	I	1804	196	146	76	Grímsvötn?	Ireland	Brackloon	53.7526	-9.55991	woodland hollow	Basaltic	Reilly and Mitchell (2015) The Holocene 25, 241-252
2011	QUB-384/G1: Borge unknown 1 cf. Loch Portain B		AD 1650-1750	I	1700	300	250	50	Unknown	Scandinavia	Borge	68.2467	13.7417	peatland	Dacitic	Pilcher et al. (2005) Boreas 34, 136-156
2011	QUB-384/G3: Borge unknown 2		AD 1650-1750	I	1700	300	250	50	Unknown	Scandinavia	Borge	68.2467	13.7417	peatland	Dacitic	Pilcher et al. (2005) Boreas 34, 136-156
2011	QUB-384/G4: Borge unknown 3		AD 1650-1750	I	1700	300	250	50	Unknown	Scandinavia	Borge	68.2467	13.7417	peatland	Dacitic	Pilcher et al. (2005) Boreas 34, 136-156
2015	QUB-384/G3: Borge unknown 2		AD 1650-1750	I	1700	300	250	50	Unknown	Great Britain	Cors Fochno	52.504	-4.012	peatland	Dacitic	Watson (unpublished data)
2015	QUB-384/G4: Borge unknown 3		AD 1650-1750	I	1700	300	250	50	Unknown	Great Britain	Cors Fochno	52.504	-4.012	peatland	Dacitic	Watson (unpublished data)
2011	Hekla 1693?		AD 1693	H	1693	307	257	0	Hekla	Ireland	Lough Naman	54.439	-7.88516	peatland	Dacitic-Andesitic	Rea (2012) Peatland records of recent (last c.250 years) climate change in the North of Ireland. PhD Thesis - Queens University Belfast
2011	Hekla 1693?		AD 1693	H	1693	307	257	0	Hekla	Ireland	Moneygal	54.7421	-7.63122	peatland	Dacitic-Andesitic	Rea (2012) Peatland records of recent (last c.250 years) climate change in the North of Ireland. PhD Thesis - Queens University Belfast
2011	SLU-5		c. AD 1600-1700	I	1650	350	300	50	Unknown	Ireland	Sluggan	54.7667	-6.2833	peatland	Rhyolitic	Hall and Pilcher (2002) The Holocene 12, 223-230;
2011	Hekla 1510		AD 1510	H	1510	490	440	0	Hekla	Great Britain	Achany Glen	57.983	-4.396	peatland	Dacitic-Andesitic	Dugmore et al. (1996) Journal of Quaternary Science 11, 511-516
2011	Hekla 1510		AD 1510	H	1510	490	440	0	Hekla	Ireland	Annagarriff	54.5	-6.62	peatland	Dacitic-Andesitic	Hall and Bunting (2001) Tephra-dated pollen studies of medieval landscapes in the north of Ireland. In: Gaelic Ireland c.1250-1650: land lordship and settlement. Four Courts Press Dublin, 207-222
2011	Hekla 1510		AD 1510	H	1510	490	440	0	Hekla	Ireland	Black	54.6731	-7.01648	peatland	Dacitic-Andesitic	Rea (2012) Peatland records of recent (last c.250 years) climate change in the North of Ireland. PhD Thesis - Queens University Belfast
2015	Hekla 1510		AD 1510	H	1510	490	440	0	Hekla	Ireland	Camillan	52.0167	-9.53333	woodland hollow	Dacitic-Andesitic	Reilly and Mitchell (2015) The Holocene 25, 241-252
2011	Hekla 1510		AD 1510	H	1510	490	440	0	Hekla	Ireland	Claraghmore	54.6309	-7.458	peatland	Dacitic-Andesitic	Plunkett et al. (2004) The Holocene 14, 780-786; Hall and Pilcher (2002) The Holocene 12, 223-230; Hall and Bunting (2001) Tephra-dated pollen studies of medieval landscapes in the north of Ireland. In: Gaelic Ireland c.1250-1650: land lordship and settlement. Four Courts Press Dublin, 207-222
2011	Hekla 1510		AD 1510	H	1510	490	440	0	Hekla	Ireland	Dead Island	54.8867	-6.5491	peatland	Dacitic-Andesitic	Swindles et al. (2010) Quaternary Science Reviews 29, 1577-1589; Swindles and Roe (2006) Quaternary Newsletter 110, 2-9; Swindles (2006) Reconstruction of Holocene climate change from peatlands in the North of Ireland. PhD thesis, Queen's University Belfast
2011	Hekla 1510		AD 1510	H	1510	490	440	0	Hekla	Ireland	Derrycunihy Wood	51.97	-9.6	woodland hollow	Dacitic-Andesitic	Reilly, E. 2006. Quaternary Newsletter 109, 42-45
2011	Hekla 1510		AD 1510	H	1510	490	440	0	Hekla	Ireland	Fallahogy	54.75	-6.6	peatland	Dacitic-Andesitic	Watson et al. (2015) Quaternary Science Reviews 124, 248-264
2011	Hekla 1510		AD 1510	H	1510	490	440	0	Hekla	Ireland	Garron	55.0021	-6.06291	peatland	Dacitic-Andesitic	Rea (2012) Peatland records of recent (last c.250 years) climate change in the North of Ireland. PhD Thesis - Queens University Belfast
2011	Hekla 1510		AD 1510	H	1510	490	440	0	Hekla	Ireland	Garry Bog	55.0833	-6.5667	peatland	Dacitic-Andesitic	Hall and Pilcher (2002) The Holocene 12, 223-230; Pilcher et al. (1996) Journal of Quaternary Science 11, 485-494; Holmes (1998) A tephra-dated study of vegetation and climate change in the mid-Holocene of north-west Europe. PhD thesis, Queen's University Belfast; Plunkett (1999) Environmental change in the Late Bronze Age in Ireland (1200-600 cal. BC). PhD thesis, Queen's University Belfast
2011	Hekla 1510		AD 1510	H	1510	490	440	0	Hekla	Ireland	Garvaghullion	54.3793	-7.25732	peatland	Dacitic-Andesitic	Hall and Pilcher (2002) The Holocene 12, 223-230; Hall and Bunting (2001) Tephra-dated pollen studies of medieval landscapes in the north of Ireland. In: Gaelic Ireland c.1250-1650: land lordship and settlement. Four Courts Press Dublin, 207-222
2011	Hekla 1510		AD 1510	H	1510	490	440	0	Hekla	Great Britain	Lairg	57.98	-4.39	peatland	Dacitic-Andesitic	Dugmore et al. (1995) The Holocene 5, 257-266
2011	Loch Portain B tephra		c. AD 1510	A	1510	490	440		Hekla?	Great Britain	Lairg	57.98	-4.39	peatland	Rhyolitic	Dugmore et al. (1995) The Holocene 5, 257-266
2011	Hekla 1510		AD 1510	H	1510	490	440	0	Hekla	Ireland	Liffey Head	53.15	-6.2833	peatland	Dacitic-Andesitic	Cole and Mitchell (2003) The Holocene 13, 507-515
2011	Hekla 1510		AD 1510	H	1510	490	440	0	Hekla	Great Britain	Loch Portain	57.633	-7.1	lake	Dacitic-Andesitic	Dugmore et al. (1995) The Holocene 5, 257-266
2011	Loch Portain B tephra		c. AD 1510	A	1510	490	440		Hekla?	Great Britain	Loch Portain	57.633	-7.1	lake	Rhyolitic	Dugmore et al. (1995) The Holocene 5, 257-266
2011	Hekla 1510		AD 1510	H	1510	490	440	0	Hekla	Ireland	Meenadoan	54.5939	-7.62328	peatland	Dacitic-Andesitic	Rea (2012) Peatland records of recent (last c.250 years) climate change in the North of Ireland. PhD Thesis - Queens University Belfast
2011	Hekla 1510		AD 1510	H	1510	490	440	0	Hekla	Great Britain	Mòine Mhór	56.51	-5.28	peatland	Dacitic-Andesitic	Housley et al. (2010) Journal of Archaeological Science 37, 577-593
2011	Hekla 1510		AD 1510	H	1510	490	440	0	Hekla	Ireland	Moneygal	54.7421	-7.63122	peatland	Dacitic-Andesitic	Rea (2012) Peatland records of recent (last c.250 years) climate change in the North of Ireland. PhD Thesis - Queens University Belfast
2011	Hekla 1510		AD 1510	H	1510	490	440	0	Hekla	Ireland	Pettigoe	54.5334	-7.9853	peatland	Dacitic-Andesitic	Rea (2012) Peatland records of recent (last c.250 years) climate change in the North of Ireland. PhD Thesis - Queens University Belfast
2014	Hekla 1510		AD 1510	H	1510	490	440	0	Hekla	Great Britain	Ricksy Ball	51.1278	-3.84334	peatland	Dacitic-Andesitic	Fyfe et al. (2014) South West Water Report: http://www.southwestwater.co.uk/media/pdf/5/5/Vegetation_and_climate_change_on_Exmoor_Fyfe_et_al_2014.pdf.
2013	Hekla 1510		AD 1510	H	1510	490	440	0	Hekla?	Great Britain	Roman Lode	51.1294	-3.78347	peatland	Andesitic	Matthews et al. (2008) Roman Lode, Exmoor, Devon: Tephrochronology Scientific Dating Report. Research Department Report Series English Heritage
2011	Hekla 1510		AD 1510	H	1510	490	440	0	Hekla	Ireland	Slieveanorra	55.0729	-6.2276	peatland	Dacitic-Andesitic	Swindles et al. (2010) Quaternary Science Reviews 29, 1577-1589; Swindles and Roe (2006) Quaternary Newsletter 110, 2-9; Swindles (2006) Reconstruction of Holocene climate change from peatlands in the North of Ireland. PhD thesis, Queen's University Belfast
2011	Hekla 1510		AD 1510	H	1510	490	440	0	Hekla	Ireland	Sluggan	54.7667	-6.2833	peatland	Dacitic-Andesitic	Hall and Pilcher (2002) The Holocene 12, 223-230; Pilcher et al. (1996) Journal of Quaternary Science 11, 485-494
2011	Hekla 1510		AD 1510	H	1510	490	440	0	Hekla	Ireland	Tattenamona	54.2761	-7.71676	peatland	Dacitic-Andesitic	Rea (2012) Peatland records of recent (last c.250 years) climate change in the North of Ireland. PhD Thesis - Queens University Belfast
2011	MOR-T1 / Veiðivötn 1477		c. AD 1477	I	1477	523	473		Veiðivötn	Ireland	An Loch Mór	53.0667	-9.5056	lake	Basaltic	Chambers et al. (2004) The Holocene 14, 703-720
2011	Veiðivötn 1477		AD 1477	H	1477	523	473	0	Veiðivötn	Scandinavia	Getvaltjärnen	63.21	12.3	lake	Basaltic	Davies et al. (2007) Holocene 17, 319-330
2011	MOR-T2	= PMG-5	c. AD 1400	I	1400	600	550		Jan Mayen	Ireland	An Loch Mór	53.0667	-9.5056	lake	Trachyte	Chambers et al. (2004) The Holocene 14, 703-720
2011	MOR-T2	= PMG-5	c. AD 1400	I	1400	600	550		Jan Mayen	Ireland	Mongan	53.3333	-7.9333	peatland	Trachyte	Hall and Mauquoy (2005) The Holocene 15, 1086-1093
2011	MOR-T2	= PMG-5	c. AD 1400	I	1400	600	550		Jan Mayen	Ireland	Portmagee	51.95	-10.3667	peatland	Trachyte	Hall (2003) The Holocene 13, 131-138
2011	Öræfajökull 1362		AD 1362	H	1362	638	588	0	Öræfajökull	Ireland	Barnsmore	54.7333	-7.9167	peatland	Rhyolitic	Pilcher et al. (1996) Journal of Quaternary Science 11, 485-494; Hall and Pilcher (2002) The Holocene 12, 223-230
2011	Öræfajökull 1362		AD 1362	H	1362	638	588	0	Askja	Scandinavia	Bødalsvatnett	68.3187	13.9407	lake	Rhyolitic	Pilcher et al. (2005) Boreas 34, 136-156
2011	Öræfajökull 1362		AD 1362	H	1362	638	588	0	Askja	Scandinavia	Borge	68.2467	13.7417	peatland	Rhyolitic	Pilcher et al. (2005) Boreas 34, 136-156
2015	Öræfajökull 1362		AD 1362	H	1362	638	588	0	Öræfajökull	Ireland	Claraghmore	54.6309	-7.458	peatland	Rhyolitic	Watson et al (2016) Quaternary Science Reviews 139, 110-128
2011	Öræfajökull 1362		AD 1362	H	1362	638	588	0	Öræfajökull	Ireland	Garry Bog	55.0833	-6.5667	peatland	Rhyolitic	Hall and Pilcher (2002) The Holocene 12, 223-230; Pilcher et al. (1996) Journal of Quaternary Science 11, 485-494; Holmes (1998) A tephra-dated study of vegetation and climate change in the mid-Holocene of north-west Europe. PhD thesis, Queen's University Belfast; Plunkett (1999) Environmental change in the Late Bronze Age in Ireland (1200-600 cal. BC). PhD thesis, Queen's University Belfast
2011	Öræfajökull 1362		AD 1362	H	1362	638	588	0	Öræfajökull	Ireland	Garvaghullion	54.3793	-7.25732	peatland	Rhyolitic	Hall and Pilcher (2002) The Holocene 12, 223-230; Hall and Bunting (2001) Tephra-dated pollen studies of medieval landscapes in the north of Ireland. In: Gaelic Ireland c.1250-1650: land lordship and settlement. Four Courts Press Dublin, 207-222
2011	Öræfajökull 1362		AD 1362	H	1362	638	588	0	Askja	Scandinavia	Lilla Backsjömyren	62.6856	14.5406	peatland	Rhyolitic	Wastegård et al. (2009) GFF 131, 293-297
2011	Öræfajökull 1362		AD 1362	H	1362	638	588	0	Öræfajökull	Ireland	Moneyveagh	53.3667	-8.6833	peatland	Rhyolitic	Hall (2003) The Holocene 13, 131-138
2011	Öræfajökull 1362		AD 1362	H	1362	638	588	0	Öræfajökull	Ireland	Owenbeg	54.25	-8.9	peatland	Rhyolitic	Hall and Pilcher (2002) The Holocene 12, 223-230; Pilcher et al. (1996) Journal of Quaternary Science 11, 485-494
2011	Öræfajökull 1362		AD 1362	H	1362	638	588	0	Öræfajökull	Ireland	Sluggan	54.7667	-6.2833	peatland	Rhyolitic	Hall and Pilcher (2002) The Holocene 12, 223-230; Pilcher et al. (1996) Journal of Quaternary Science 11, 485-494
2011	QUB-385/G1: Borge unknown 4		~AD 1362	A	1362	638	588		Unknown	Scandinavia	Borge	68.2467	13.7417	peatland	Dacitic-Trachydacitic	Pilcher et al. (2005) Boreas 34, 136-156
2011	GB4-50		c. AD 1250	I	1250	750	700		Unknown	Ireland	Garry Bog	55.0833	-6.5667	peatland	Rhyolitic	Hall and Pilcher (2002) The Holocene 12, 223-230; Holmes (1998) A tephra-dated study of vegetation and climate change in the mid-Holocene of north-west Europe. PhD thesis, Queen's University Belfast; Plunkett (1999) Environmental change in the Late Bronze Age in Ireland (1200-600 cal. BC). PhD thesis, Queen's University Belfast
2011	Hekla 1158		AD 1158	H	1158	842	792	0	Hekla	Scandinavia	Borge	68.2467	13.7417	peatland	Dacitic	Pilcher et al. (2005) Boreas 34, 136-156
2015	Hekla 1158		AD 1158	H	1158	842	792	0	Hekla	Scandinavia	Degerö Stormyr	64.181	19.564	peatland	Dacitic	Watson et al. (2016) Quaternary Science Reviews 139, 110-128
2016	Hekla 1158		AD 1158	H	1158	842	792	0	Hekla	Scandinavia	Stordalen	68.3564	19.0441	peatland	Dacitic	Swindles et al (2016) Scientific Reports 5, 17951
2015	Hekla 1158		AD 1158	H	1158	842	792	0	Hekla	Scandinavia	Svartkälsjärn lake	64.264	19.552	lake	Dacitic	Watson et al. (2016) Quaternary Science Reviews 139, 110-128
2011	GB4-57	= Hekla 1158	c. AD 1150	I	1150	850	800		Unknown	Ireland	Garry Bog	55.0833	-6.5667	peatland	Dacitic	Hall and Pilcher (2002) The Holocene 12, 223-230; Holmes (1998) A tephra-dated study of vegetation and climate change in the mid-Holocene of north-west Europe. PhD thesis, Queen's University Belfast; Plunkett (1999) Environmental change in the Late Bronze Age in Ireland (1200-600 cal. BC). PhD thesis, Queen's University Belfast
2011	BGMT1		AD 1157	I	1157	843	830		Unknown	Great Britain	Ben Gorm Moss	57.6046	-6.3206	peatland	Mixed populations	Langdon and Barber (2001) Journal of Quaternary Science 16, 753-759, Langdon and Barber (2004) The Holocene 14, 21-33
2011	Hekla 1104		AD 1104	H	1104	896	846	0	Hekla	Ireland	Abbeyknockmoy	53.4408	-8.7675	peatland	Rhyolitic	Lomas-Clarke and Barber (2004) Vegetation History and Archaeobotany 14, 721-731
2011	Hekla 1104		AD 1104	H	1104	896	846	0	Hekla	Ireland	All Saints	53.15	-7.9833	peatland	Rhyolitic	Cole and Mitchell (2003) The Holocene 13, 507-515
2011	Hekla 1104		AD 1104	H	1104	896	846	0	Hekla	Ireland	An Loch Mór	53.0667	-9.5056	lake	Rhyolitic	Chambers et al. (2004) The Holocene 14, 703-720
2011	Hekla 1104		AD 1104	H	1104	896	846	0	Hekla	Ireland	Ballygisheen	51.9667	-9.9	peatland	Rhyolitic	Cole and Mitchell (2003) The Holocene 13, 507-515
2011	Hekla 1104		AD 1104	H	1104	896	846	0	Hekla	Ireland	Ballyscullion East	54.8	-6.4667	peatland	Rhyolitic	Hall et al. (1993) New Phytologist 125, 193-202; Pilcher et al. (1996) Journal of Quaternary Science 11, 485-494
2011	Hekla 1104		AD 1104	H	1104	896	846	0	Hekla	Scandinavia	Borge	68.2467	13.7417	peatland	Rhyolitic	Pilcher et al. (2005) Boreas 34, 136-156
2011	Hekla 1104		AD 1104	H	1104	896	846	0	Hekla	Faroes	Brúnavatn	62.07	-6.85	lake	Rhyolitic	Olsen et al. (2010) Quaternary Science Reviews 29, 2764-2780
2015	Hekla 1104		AD 1104	H	1104	896	846	0	Hekla	Ireland	Camillan	52.0167	-9.53333	woodland hollow	Rhyolitic	Reilly and Mitchell (2015) The Holocene 25, 241-252
2011	Hekla 1104		AD 1104	H	1104	896	846	0	Hekla	Ireland	Clara	53.02	-7.038	peatland	Rhyolitic	Hall and Pilcher (2002) The Holocene 12, 223-230
2015	Hekla 1104		AD 1104	H	1104	896	846	0	Hekla	Ireland	Claraghmore	54.6309	-7.458	peatland	Rhyolitic	Watson et al (2016) Quaternary Science Reviews 139, 110-128
2015	Hekla 1104		AD 1104	H	1104	896	846	0	Hekla	Scandinavia	Degerö Stormyr	64.181	19.564	peatland	Rhyolitic	Watson et al. (2016) Quaternary Science Reviews 139, 110-128
2011	Hekla 1104		AD 1104	H	1104	896	846	0	Hekla	Ireland	Derrycunihy Wood	51.97	-9.6	woodland hollow	Rhyolitic	Reilly, E. 2006. Quaternary Newsletter 109, 42-45
2011	Hekla 1104		AD 1104	H	1104	896	846	0	Hekla	Ireland	Emlagh Bog	53.78	-6.75	peatland	Rhyolitic	Newman et al. (2007) Vegetation History & Archaeobotany 16, 349-365
2011	Hekla 1104		AD 1104	H	1104	896	846	0	Hekla	Ireland	Fallahogy	54.75	-6.6	peatland	Rhyolitic	Swindles (Unpublished data)
2011	Hekla 1104		AD 1104	H	1104	896	846	0	Hekla	Ireland	Garry Bog	55.0833	-6.5667	peatland	Rhyolitic	Hall and Pilcher (2002) The Holocene 12, 223-230; Pilcher et al. (1996) Journal of Quaternary Science 11, 485-494; Holmes (1998) A tephra-dated study of vegetation and climate change in the mid-Holocene of north-west Europe. PhD thesis, Queen's University Belfast; Plunkett (1999) Environmental change in the Late Bronze Age in Ireland (1200-600 cal. BC). PhD thesis, Queen's University Belfast
2011	Hekla 1104		AD 1104	H	1104	896	846	0	Hekla	Ireland	Gortahurk	54.3167	-7.8	peatland	Rhyolitic	Hall (2003) The Holocene 13, 131-138
2011	Hekla 1104		AD 1104	H	1104	896	846	0	Hekla	Ireland	Monaincha	52.9333	-7.7167	peatland	Rhyolitic	Hall (2003) The Holocene 13, 131-138
2011	Hekla 1104		AD 1104	H	1104	896	846	0	Hekla	Ireland	Moneyveagh	53.3667	-8.6833	peatland	Rhyolitic	Hall (2003) The Holocene 13, 131-138
2011	Hekla 1104		AD 1104	H	1104	896	846	0	Hekla	Ireland	Mongan	53.3333	-7.9333	peatland	Rhyolitic	Hall and Mauquoy (2005) The Holocene 15, 1086-1093
2011	Hekla 1104		AD 1104	H	1104	896	846	0	Hekla	Ireland	Moyreen	52.5328	-9.179	peatland	Rhyolitic	Plunkett (2006) Journal of Quaternary Science 21, 9-16; Plunkett (1999) Environmental change in the Late Bronze Age in Ireland (1200-600 cal. BC). PhD thesis, Queen's University Belfast
2011	Hekla 1104		AD 1104	H	1104	896	846	0	Hekla	Ireland	Owenbeg	54.25	-8.9	peatland	Rhyolitic	Hall and Pilcher (2002) The Holocene 12, 223-230; Pilcher et al. (1996) Journal of Quaternary Science 11, 485-494
2011	Hekla 1104		AD 1104	H	1104	896	846	0	Hekla	Ireland	Portmagee	51.95	-10.3667	peatland	Rhyolitic	Hall (2003) The Holocene 13, 131-138
2015	Hekla 1104		AD 1104	H	1104	896	846	0	Hekla	Scandinavia	Sammakovuoma bog	66.995	21.457	peatland	Rhyolitic	Watson et al. (2016) Quaternary Science Reviews 139, 110-128
2015	Hekla 1104		AD 1104	H	1104	896	846	0	Hekla	Scandinavia	Sammakovuoma lake	66.992	21.5	lake	Rhyolitic	Watson et al. (2016) Quaternary Science Reviews 139, 110-128
2011	Hekla 1104		AD 1104	H	1104	896	846	0	Hekla	Scandinavia	Sellevoll (aka Sellevollmyra)	69.1083	15.9417	peatland	Rhyolitic	Vorren et al. (2007) Boreas 36, 253-277
2011	Hekla 1104		AD 1104	H	1104	896	846	0	Hekla	Ireland	Sluggan	54.7667	-6.2833	peatland	Rhyolitic	Hall and Pilcher (2002) The Holocene 12, 223-230; Pilcher et al. (1996) Journal of Quaternary Science 11, 485-494
2015	Hekla 1104		AD 1104	H	1104	896	846	0	Hekla	Scandinavia	Svartkälsjärn lake	64.264	19.552	lake	Rhyolitic	Watson et al. (2016) Quaternary Science Reviews 139, 110-128
2011	MOR-T4		c. AD 1000	I	1000	1000	950		Unknown	Ireland	An Loch Mór	53.0667	-9.5056	lake	Rhyolitic-Dacitic	Chambers et al. (2004) The Holocene 14, 703-720
2015	MOR-T4		c. AD 1000	I	1000	1000	950		Unknown	Ireland	Claraghmore	54.6309	-7.458	peatland	Rhyolitic-Dacitic	Watson et al (2016) Quaternary Science Reviews 139, 110-128
2015	MOR-T4		c. AD 1000	I	1000	1000	950		Unknown	Ireland	Claraghmore lough	54.631	-7.45	lake	Rhyolitic-Dacitic	Watson et al (2016) Quaternary Science Reviews 139, 110-128
2015	MOR-T4		c. AD 1000	I	1000	1000	950		Unknown	Great Britain	Cors Fochno	52.504	-4.012	peatland	Rhyolitic-Dacitic	Watson (unpublished data)
2011	BMR-90		c. AD 920	I	920	1080	1030		Unknown	Ireland	Barnsmore	54.7333	-7.9167	peatland	Rhyolitic	Pilcher et al. (1996) Journal of Quaternary Science 11, 485-494; Hall and Pilcher (2002) The Holocene 12, 223-230
2011	BIP-24a		c. AD 900	I	900	1100	1050		Unknown	Scandinavia	Borg Indrepollen	68.2494	13.8289	lake	trachy-dacite	Pilcher et al. (2005) Boreas 34, 136-156
2011	BIP-24a		c. AD 900	I	900	1100	1050		Unknown	Scandinavia	Borge	68.2467	13.7417	peatland	trachy-dacite	Pilcher et al. (2005) Boreas 34, 136-156
2011	QUB-389/G2: Borge unknown 5		c. AD 900	I	900	1100	1050		Unknown	Scandinavia	Borge	68.2467	13.7417	peatland	Dacitic	Pilcher et al. (2005) Boreas 34, 136-156
2011	QUB-389/G4: Borge unknown 6		c. AD 900	I	900	1100	1050		Unknown	Scandinavia	Borge	68.2467	13.7417	peatland	Dacitic	Pilcher et al. (2005) Boreas 34, 136-156
2011	MOR-T5		c. AD 890	I	890	1110	1060		Unknown	Ireland	An Loch Mór	53.0667	-9.5056	lake	Rhyolitic	Chambers et al. (2004) The Holocene 14, 703-720
2016	TSK11_B1u_137e142_T		AD 890-856	V	873	1127	1077	75	Grímsvötn?	Germany	Tiefer See	53.5929	12.5289	lake	Basaltic	Wulf et al. (2016) Quaternary Science Reviews 132, 1-14
2011	Landnám		AD 871±2	GRIP Ice core	871	1129	1079	2	Veiðivötn/Torfajökull	Scandinavia	Borge	68.2467	13.7417	peatland	Rhyolitic	Pilcher et al. (2005) Boreas 34, 136-156
2011	Landnám		AD 871±2	GRIP ice core	871	1129	1079	2	Veiðivötn/Torfajökull	Faroes	Hovsdalur	61.5	-6.6833	peatland	Basaltic	Wastegård (2002) Journal of Quaternary Science 17, 723-730
2011	Landnám		AD 871±2	GRIP Ice core	871	1129	1079	2	Veiðivötn/Torfajökull	Great Britain	Loch Sunart	56.4019	-5.5212	lake	Basaltic	Cage et al. (2011) Quaternary International 246, 168-176
2011	Landnám		AD 871±2	GRIP ice core	871	1129	1079	2	Veiðivötn/Torfajökull	Faroes	Tjørnuvík	62.283	-7.15	peatland	Basaltic	Jóhansen (1971) Fróðskaparrit 19, 147-157,Hannon et al. (2001) Proceedings of the Royal Irish Academy 101B, 129-139
2011	Tjørnuvík		9th century AD	I	850	1150	1100		Hekla	Faroes	Eiði	62.3	-7.0833	lake drained 1920s	Andesitic-Rhyolitic	Wastegård et al. (2001) The Holocene 11, 101-109
2011	Tjørnuvík		9th century AD	I	850	1150	1100		Hekla	Faroes	Hovsdalur	61.5	-6.6833	peatland	Andesitic-Rhyolitic	Wastegård (2002) Journal of Quaternary Science 17, 723-730
2011	Tjørnuvík		9th century AD	I	850	1150	1100		Hekla	Faroes	Tjørnuvík	62.283	-7.15	peatland	Andesitic-Rhyolitic	Jóhansen (1971) Fróðskaparrit 19, 147-157,Hannon et al. (2001) Proceedings of the Royal Irish Academy 101B, 129-139
2011	MOR-T6		c. AD 840	I	840	1160	1110		Hekla	Ireland	An Loch Mór	53.0667	-9.5056	lake	Rhyolitic	Chambers et al. (2004) The Holocene 14, 703-720
2011	AD 860 A		AD 776-887	W	833	1167	1117	55.5	Grímsvötn?	Ireland	An Loch Mór	53.0667	-9.5056	lake	Rhyolitic	Chambers et al. (2004) The Holocene 14, 703-720
2011	AD 860 B		AD 846-848	I	833	1167	1117	55.5	Mount Churchill	Ireland	Ballyscullion East	54.8	-6.4667	peatland	Rhyolitic	Hall et al. (1993) New Phytologist 125, 193-202; Pilcher et al. (1996) Journal of Quaternary Science 11, 485-494
2011	Askja 1875		AD 776-887	W	833	1167	75		Askja	Scandinavia	Barackmossen	60.0417	14.6667	peatland	Rhyolitic	Boygle (2004) Journal of Quaternary Science 19, 103-109
2011	AD 860 B		AD 846-848	I	833	1167	1117	55.5	Mount Churchill	Ireland	Barnsmore	54.7333	-7.9167	peatland	Rhyolitic	Pilcher et al. (1996) Journal of Quaternary Science 11, 485-494; Hall and Pilcher (2002) The Holocene 12, 223-230
2011	AD 860 B		AD 846-848	I	833	1167	1117	55.5	Mount Churchill	Scandinavia	Borg Indrepollen	68.2494	13.8289	lake	Rhyolitic	Pilcher et al. (2005) Boreas 34, 136-156
2011	AD 860 B		AD 846-848	I	833	1167	1117	55.5	Mount Churchill	Ireland	Clara	53.02	-7.038	peatland	Rhyolitic	Hall and Pilcher (2002) The Holocene 12, 223-230
2011	AD 860 B		AD 846-848	I	833	1167	1117	55.5	Mount Churchill	Ireland	Claraghmore	54.6309	-7.458	peatland	Rhyolitic	Plunkett et al. (2004) The Holocene 14, 780-786; Hall and Pilcher (2002) The Holocene 12, 223-230; Hall and Bunting (2001) Tephra-dated pollen studies of medieval landscapes in the north of Ireland. In: Gaelic Ireland c.1250-1650: land lordship and settlement. Four Courts Press Dublin, 207-222
2011	AD 860 A		AD 776-887	W	833	1167	1117	55.5	Grímsvötn?	Ireland	Dead Island	54.8867	-6.5491	peatland	Rhyolitic	Swindles et al. (2010) Quaternary Science Reviews 29, 1577-1589; Swindles and Roe (2006) Quaternary Newsletter 110, 2-9; Swindles (2006) Reconstruction of Holocene climate change from peatlands in the North of Ireland. PhD thesis, Queen's University Belfast
2011	AD 860 B		AD 846-848	I	833	1167	1117	55.5	Mount Churchill	Ireland	Dead Island	54.8867	-6.5491	peatland	Rhyolitic	Swindles et al. (2010) Quaternary Science Reviews 29, 1577-1589; Swindles and Roe (2006) Quaternary Newsletter 110, 2-9; Swindles (2006) Reconstruction of Holocene climate change from peatlands in the North of Ireland. PhD thesis, Queen's University Belfast
2011	AD 860 B		AD 846-848	I	833	1167	1117	55.5	Mount Churchill	Ireland	Derryloughan	54.3156	-6.35834	peatland	Rhyolitic	Hall and Pilcher (2002) The Holocene 12, 223-230
2011	AD 860 B	= DOM 2	AD 846-848	I	833	1167	1117	55.5	Mount Churchill	Germany	Dosenmoor margin	54.1337	10.0269	peatland	Rhyolitic	van den Bogaard and Schmincke (2002) Journal of Quaternary Science 17, 3-20, van den Bogaard et al. (2002) Quaternary Research 57, 314-324
2011	AD 860 B		AD 846-848	I	833	1167	1117	55.5	Mount Churchill	Ireland	Emlagh Bog	53.78	-6.75	peatland	Rhyolitic	Newman et al. (2007) Vegetation History & Archaeobotany 16, 349-365
2011	AD 860 B		AD 846-848	I	833	1167	1117	55.5	Mount Churchill	Ireland	Fallahogy	54.75	-6.6	peatland	Rhyolitic	Barber et al. (2000) Quaternary Science Reviews 19, 481-487
2011	AD 860 A		AD 776-887	W	833	1167	1117	55.5	Grímsvötn?	Ireland	Garry Bog	55.0833	-6.5667	peatland	Rhyolitic	Hall and Pilcher (2002) The Holocene 12, 223-230; Holmes (1998) A tephra-dated study of vegetation and climate change in the mid-Holocene of north-west Europe. PhD thesis, Queen's University Belfast;Plunkett (1999) Environmental change in the Late Bronze Age in Ireland (1200-600 cal. BC). PhD thesis, Queen's University Belfast
2011	AD 860 B		AD 846-848	I	833	1167	1117	55.5	Mount Churchill	Ireland	Garry Bog	55.0833	-6.5667	peatland	Rhyolitic	Hall and Pilcher (2002) The Holocene 12, 223-230; Holmes (1998) A tephra-dated study of vegetation and climate change in the mid-Holocene of north-west Europe. PhD thesis, Queen's University Belfast;Plunkett (1999) Environmental change in the Late Bronze Age in Ireland (1200-600 cal. BC). PhD thesis, Queen's University Belfast
2011	AD 860 B		AD 846-848	I	833	1167	1117	55.5	Mount Churchill	Ireland	Glen West	54.4167	-8.0333	peatland	Rhyolitic	Swindles et al. (2007) Journal of Quaternary Science 22, 667-679; Plunkett et al. (2004) The Holocene 14, 780-786; Plunkett (1999) Environmental change in the Late Bronze Age in Ireland (1200-600 cal. BC). PhD thesis, Queen's University Belfast
2011	AD 860 B	=DOM 2	AD 846-848	I	833	1167	1117	55.5	Mount Churchill	Germany	Grambow	53.5973	11.2773	peatland	Rhyolitic	van den Bogaard and Schmincke (2002) Journal of Quaternary Science 17, 3-20, van den Bogaard et al. (2002) Quaternary Research 57, 314-324
2011	AD 860 B	=DOM 2	AD 846-848	I	833	1167	1117	55.5	Mount Churchill	Germany	Jardelunde	54.822	9.2397	peatland	Rhyolitic	van den Bogaard and Schmincke (2002) Journal of Quaternary Science 17, 3-20, van den Bogaard et al. (2002) Quaternary Research 57, 314-324
2015	Unknown		AD 846-848	I	833	1167	1117	55.5	Mount Churchill	Poland	Kusowskie Bagno	53.816	16.588	peatland	Rhyolitic	Watson (unpublished data)
2011	AD 860 A		AD 776-887	W	833	1167	1117	55.5	Grímsvötn?	Great Britain	Langlands Moss	55.7358	-4.1771	peatland	Rhyolitic	Langdon and Barber (2004) The Holocene 14, 21-33, Langdon and Barber (2005) Journal of Quaternary Science 20, 549-566
2011	AD 860 B		AD 846-848	I	833	1167	1117	55.5	Mount Churchill	Great Britain	Langlands Moss	55.7358	-4.1771	peatland	Rhyolitic	Langdon and Barber (2004) The Holocene 14, 21-33, Langdon and Barber (2005) Journal of Quaternary Science 20, 549-566
2011	AD 860 B		AD 846-848	I	833	1167	1117	55.5	Mount Churchill	Ireland	Lollymore	53.163	-6.56447	peatland	Rhyolitic	Hall and Pilcher (2002) The Holocene 12, 223-230
2011	AD 860 B		AD 846-848	I	833	1167	1117	55.5	Mount Churchill	Ireland	Lough Lurgeen	53.5798	-8.5134	lake	Rhyolitic	Plunkett (1999) Environmental change in the Late Bronze Age in Ireland (1200-600 cal. BC). PhD thesis, Queen's University Belfast
2011	AD 860 B		AD 846-848	I	833	1167	1117	55.5	Mount Churchill	Ireland	Owenduff	53.9643	-9.6915	peatland	Rhyolitic	Plunkett (2006) Journal of Quaternary Science 21, 9-16; Plunkett (1999) Environmental change in the Late Bronze Age in Ireland (1200-600 cal. BC). PhD thesis, Queen's University Belfast
2014	AD 860 A		AD 776-887	W	833	1167	1117	55.5	Grímsvötn?	Great Britain	Ricksy Ball	51.1278	-3.84334	peatland	Rhyolitic	Fyfe et al. (2014) South West Water Report: http://www.southwestwater.co.uk/media/pdf/5/5/Vegetation_and_climate_change_on_Exmoor_Fyfe_et_al_2014.pdf.
2015	AD 860 B		AD 846-848	I	833	1167	1117	55.5	Mount Churchill	Great Britain	Rough Tor Bodmin	50.589	-4.625	peatland	Rhyolitic	Watson (unpublished data)
2015	AD 860 A		AD 776-887	W	833	1167	1117	55.5	Grímsvötn?	Great Britain	Rough Tor Bodmin	50.589	-4.625	peatland	Rhyolitic	Watson (unpublished data)
2011	AD 860 A		AD 776-887	W	833	1167	1117	55.5	Grímsvötn?	Ireland	Sluggan	54.7667	-6.2833	peatland	Rhyolitic	Hall and Pilcher (2002) The Holocene 12, 223-230; Plunkett (2006) Journal of Quaternary Science 21, 9-16; Pilcher et al. (1996) Journal of Quaternary Science 11, 485-494
2011	AD 860 B		AD 846-848	I	833	1167	1117	55.5	Mount Churchill	Ireland	Sluggan	54.7667	-6.2833	peatland	Rhyolitic	Hall and Pilcher (2002) The Holocene 12, 223-230; Plunkett (2006) Journal of Quaternary Science 21, 9-16; Pilcher et al. (1996) Journal of Quaternary Science 11, 485-494
2011	QUB-571/G3: Borge unknown 7		c. AD 700-870	A	785	1215	1165	85	Unknown	Scandinavia	Borge	68.2467	13.7417	peatland	Rhyolitic	Pilcher et al. (2005) Boreas 34, 136-156
2011	GA4-85		c. AD 700-800	I	750	1250	1200	50	Katla?	Ireland	Barnsmore	54.7333	-7.9167	peatland	Dacitic-Trachydacitic	Pilcher et al. (1996) Journal of Quaternary Science 11, 485-494; Hall and Pilcher (2002) The Holocene 12, 223-230
2011	GA4-85		c. AD 700-800	I	750	1250	1200	50	Katla?	Ireland	Dead Island	54.8867	-6.5491	peatland	Dacitic-Trachydacitic	Swindles et al. (2010) Quaternary Science Reviews 29, 1577-1589; Swindles and Roe (2006) Quaternary Newsletter 110, 2-9; Swindles (2006) Reconstruction of Holocene climate change from peatlands in the North of Ireland. PhD thesis, Queen's University Belfast
2011	GA4-85		c. AD 700-800	I	750	1250	1200	50	Katla?	Ireland	Garry Bog	55.0833	-6.5667	peatland	Dacitic-Trachydacitic	Hall and Pilcher (2002) The Holocene 12, 223-230; Holmes (1998) A tephra-dated study of vegetation and climate change in the mid-Holocene of north-west Europe. PhD thesis, Queen's University Belfast; Plunkett (1999) Environmental change in the Late Bronze Age in Ireland (1200-600 cal. BC). PhD thesis, Queen's University Belfast
2011	GA4-85		c. AD 700-800	I	750	1250	1200	50	Katla?	Ireland	Lough Lurgeen	53.5798	-8.5134	lake	Dacitic-Trachydacitic	Plunkett (1999) Environmental change in the Late Bronze Age in Ireland (1200-600 cal. BC). PhD thesis, Queen's University Belfast
2015	SN-1		AD 721	I	?	1279	1229	3	Snæfellsjökull	Scandinavia	Sammakovuoma Bog	66.995	21.457	peatland	trachy-dacite	Watson et al. (2016) Quaternary Science Reviews 139, 110-128
2015	SN-1		AD 721	I	?	1279	1229	3	Snæfellsjökull	Scandinavia	Sammakovuoma lake	66.992	21.5	lake	trachy-dacite	Watson et al. (2016) Quaternary Science Reviews 139, 110-128
2011	OWB-105		c. AD 700	I	700	1300	1250		Unknown	Scandinavia	Borge	68.2467	13.7417	peatland	Rhyolitic	Pilcher et al. (2005) Boreas 34, 136-156
2011	OWB-105		c. AD 700	I	700	1300	1250		Unknown	Ireland	Owenbeg	54.25	-8.9	peatland	Rhyolitic	Hall and Pilcher (2002) The Holocene 12, 223-230; Pilcher et al. (1996) Journal of Quaternary Science 11, 485-494
2011	QUB-570/G2: Borge unknown 9		c. AD 650	I	659	1341	1291		Unknown	Scandinavia	Borge	68.2467	13.7417	peatland	Andesitic	Pilcher et al. (2005) Boreas 34, 136-156
2011	Tjørnuvík B		c. AD 600-700	I	650	1350	1300	50	Hekla	Scandinavia	Borg Indrepollen	68.2494	13.8289	lake	Dacitic	Pilcher et al. (2005) Boreas 34, 136-156
2011	QUB-570/G1: Borge Unknown 8		c. AD 650	I	650	1350	1300		Unknown	Scandinavia	Borge	68.2467	13.7417	peatland	Rhyolitic	Pilcher et al. (2005) Boreas 34, 136-156
2011	DOM-3		c. AD 650	I	650	1350	1300		Unknown	Germany	Dosenmoor centre	54.1337	10.0269	peatland	Rhyolitic	van den Bogaard and Schmincke (2002) Journal of Quaternary Science 17, 3-20, van den Bogaard et al. (2002) Quaternary Research 57, 314-324
2011	DOM-3		c. AD 650	I	650	1350	1300		Unknown	Germany	Dosenmoor margin	54.1337	10.0269	peatland	Rhyolitic	van den Bogaard and Schmincke (2002) Journal of Quaternary Science 17, 3-20, van den Bogaard et al. (2002) Quaternary Research 57, 314-324
2011	DOM-3		c. AD 650	I	650	1350	1300		Unknown	Germany	Grambow	53.5973	11.2773	peatland	Rhyolitic	van den Bogaard and Schmincke (2002) Journal of Quaternary Science 17, 3-20, van den Bogaard et al. (2002) Quaternary Research 57, 314-324
2011	QUB-569/G1: Borge unknown 10		c. AD 625	I	625	1375	1325		Unknown	Scandinavia	Borge	68.2467	13.7417	peatland	Rhyolitic	Pilcher et al. (2005) Boreas 34, 136-156
2011	QUB-568/G3: Borge unknown 11		c. AD 600	I	600	1400	1350		Unknown	Scandinavia	Borge	68.2467	13.7417	peatland	Rhyolitic	Pilcher et al. (2005) Boreas 34, 136-156
2011	QUB-567/G1: Borge unknown 12		c. AD 400-500	I	450	1550	1500	50	Unknown	Scandinavia	Borge	68.2467	13.7417	peatland	Rhyolitic	Pilcher et al. (2005) Boreas 34, 136-156
2011	QUB-567/G2: Borge unknown 13		c. AD 400-500	I	450	1550	1500	50	Unknown	Scandinavia	Borge	68.2467	13.7417	peatland	Andesitic	Pilcher et al. (2005) Boreas 34, 136-156
2011	DOM-4		c. AD 400	I	400	1600	1550		Unknown	Germany	Dosenmoor centre	54.1337	10.0269	peatland	Andesitic-Rhyolitic	van den Bogaard and Schmincke (2002) Journal of Quaternary Science 17, 3-20, van den Bogaard et al. (2002) Quaternary Research 57, 314-324
2011	DOM-4		c. AD 400	I	400	1600	1550		Unknown	Germany	Dosenmoor margin	54.1337	10.0269	peatland	Andesitic-Rhyolitic	van den Bogaard and Schmincke (2002) Journal of Quaternary Science 17, 3-20, van den Bogaard et al. (2002) Quaternary Research 57, 314-324
2011	MOR-T7		c. AD 280	I	280	1720	1670		Jan Mayen	Ireland	An Loch Mór	53.0667	-9.5056	lake	Trachyte	Chambers et al. (2004) The Holocene 14, 703-720
2011	MOR-T8		c. AD 150	I	150	1850	1800		Jan Mayen	Ireland	An Loch Mór	53.0667	-9.5056	lake	Trachyte	Chambers et al. (2004) The Holocene 14, 703-720
2011	MOR-T9		c. AD 35	I	35	1965	1915		Jan Mayen	Ireland	An Loch Mór	53.0667	-9.5056	lake	Trachyte	Chambers et al. (2004) The Holocene 14, 703-720
2016	JC09_B2_170e173_T/JC09_B2_155e158_T	=DOM4?	10 BC - 60 AD	V	25	1975	1925	20	Unknown	Poland	Lake Czechowskie	53.8735	18.2377	lake	Rhyolitic	Wulf et al. (2016) Quaternary Science Reviews 132, 1-14
2011	Stömyren (?= different phase of Glen Garry)		c. 150 BC	I	-150	2150	2100		Unknown	Scandinavia	Klocka Bog	63.3083	12.4833	peatland	Dacitic-Rhyolitic	Bergman et al. (2004) Journal of Quaternary Science 19, 241-249
2011	Stömyren (?= different phase of Glen Garry)		c. 150 BC	I	-150	2150	2100		Unknown	Scandinavia	Stömyren	60.3887	13.259	peatland	Dacitic-Rhyolitic	Wastegård (2005) Quaternary International 130, 49-62
2011	Glen Garry		16-260 BC	W	-226	2226	2176	122	Unknown	Great Britain	Achany Glen	57.983	-4.396	peatland	Dacitic-Rhyolitic	Dugmore et al. (1996) Journal of Quaternary Science 11, 511-516
2011	Glen Garry		16-260 BC	W	-226	2226	2176	122	Unknown	Great Britain	Beinn Eighe	57.63	-5.3	peatland	Dacitic-Rhyolitic	Dugmore et al. (1995) The Holocene 5, 257-266
2011	Glen Garry		16-260 BC	W	-226	2226	2176	122	Unknown	Great Britain	Ben Gorm Moss	57.6046	-6.3206	peatland	Dacitic-Rhyolitic	Langdon and Barber (2001) Journal of Quaternary Science 16, 753-759, Langdon and Barber (2004) The Holocene 14, 21-33
2011	Glen Garry		16-260 BC	W	-226	2226	2176	122	Unknown	Great Britain	Craigmaud Moss	57.61	-2.194	peatland	Dacitic-Rhyolitic	Langdon and Barber (2004) The Holocene 14, 21-33, Langdon and Barber (2005) Journal of Quaternary Science 20, 549-566
2011	Glen Garry	= DOM-5	260-16 BC	W	-226	2226	2176	122	Unknown	Germany	Dosenmoor centre	54.1337	10.0269	peatland	Dacitic-Rhyolitic	van den Bogaard and Schmincke (2002) Journal of Quaternary Science 17, 3-20, van den Bogaard et al. (2002) Quaternary Research 57, 314-324
2011	Glen Garry	= DOM-5	260-16 BC	W	-226	2226	2176	122	Unknown	Germany	Dosenmoor margin	54.1337	10.0269	peatland	Dacitic-Rhyolitic	van den Bogaard and Schmincke (2002) Journal of Quaternary Science 17, 3-20, van den Bogaard et al. (2002) Quaternary Research 57, 314-324
2011	Glen Garry		16-260 BC	W	-226	2226	2176	122	Unknown	Great Britain	Fleet Moss	54.246	-2.213	peatland	Dacitic-Rhyolitic	Pilcher and Hall (1996) The Holocene 6, 100-105
2011	Glen Garry		16-260 BC	W	-226	2226	2176	122	Unknown	Great Britain	Glen Garry	57.08	-5.1	peatland	Dacitic-Rhyolitic	Dugmore et al. (1995) The Holocene 5, 257-266
2011	Glen Garry		16-260 BC	W	-226	2226	2176	122	Unknown	Great Britain	Glen Na Beiste	58.22	-3.87	peatland	Dacitic-Rhyolitic	Dugmore et al. (1995) The Holocene 5, 257-266
2011	Glen Garry	= DOM-5	260-16 BC	W	-226	2226	2176	122	Unknown	Germany	Grambow	53.5973	11.2773	peatland	Dacitic-Rhyolitic	van den Bogaard and Schmincke (2002) Journal of Quaternary Science 17, 3-20, van den Bogaard et al. (2002) Quaternary Research 57, 314-324
2011	Glen Garry		16-260 BC	W	-226	2226	2176	122	Unknown	Great Britain	Harthope Moss	54.707	-2.2156	peatland	Dacitic-Rhyolitic	Pilcher and Hall (1996) The Holocene 6, 100-105
2011	Glen Garry	= DOM-5	260-16 BC	W	-226	2226	2176	122	Unknown	Germany	Jardelunde	54.822	9.2397	peatland	Dacitic-Rhyolitic	van den Bogaard and Schmincke (2002) Journal of Quaternary Science 17, 3-20, van den Bogaard et al. (2002) Quaternary Research 57, 314-324
2011	Glen Garry		16-260 BC	W	-226	2226	2176	122	Unknown	Great Britain	Lairg	57.98	-4.39	peatland	Dacitic-Rhyolitic	Dugmore et al. (1995) The Holocene 5, 257-266
2011	Glen Garry		16-260 BC	W	-226	2226	2176	122	Unknown	Great Britain	Langlands Moss	55.7358	-4.1771	peatland	Dacitic-Rhyolitic	Langdon and Barber (2004) The Holocene 14, 21-33, Langdon and Barber (2005) Journal of Quaternary Science 20, 549-566
2011	Glen Garry		16-260 BC	W	-226	2226	2176	122	Unknown	Great Britain	Loch Farlary	58.016	-4.075	lake	Dacitic-Rhyolitic	Tipping et al. (2008) Journal of Archaeological Science 35, 2379–2386
2011	Glen Garry		16-260 BC	W	-226	2226	2176	122	Unknown	Great Britain	Loch Leer	58.36	-3.78	lake	Dacitic-Rhyolitic	Dugmore et al. (1995) The Holocene 5, 257-266
2015	Glen Garry		16-260 BC	W	-226	2226	2176	122	Unknown	Great Britain	Malham Tarn	54.096	-2.165	lake	Dacitic-Rhyolitic	Watson et al. (2016) Quaternary Science Reviews 139, 110-128
2011	Glen Garry		16-260 BC	W	-226	2226	2176	122	Unknown	Great Britain	Malham Tarn Moss	54.097	-2.173	peatland	Dacitic-Rhyolitic	Watson et al. (2016) Quaternary Science Reviews 139, 110-128, GT Swindles (unpublished) - Yorkshire Dales
2011	Glen Garry		16-260 BC	W	-226	2226	2176	122	Unknown	Great Britain	Mallachie Moss	57.225	-4.1663	peatland	Dacitic-Rhyolitic	Langdon and Barber (2004) The Holocene 14, 21-33, Langdon and Barber (2005) Journal of Quaternary Science 20, 549-566
2011	Glen Garry		16-260 BC	W	-226	2226	2176	122	Unknown	Great Britain	New Pitsligo	57.592	-2.1333	peatland	Dacitic-Rhyolitic	Dugmore et al. (1995) The Holocene 5, 257-266
2011	Glen Garry		16-260 BC	W	-226	2226	2176	122	Unknown	Great Britain	Roundhill	57.61	-2.18	peatland	Dacitic-Rhyolitic	Dugmore et al. (1995) The Holocene 5, 257-266
2011	Glen Garry		16-260 BC	W	-226	2226	2176	122	Unknown	Great Britain	Shirgarton Moss	56.1401	-4.1822	peatland	Dacitic-Rhyolitic	Langdon and Barber (2004) The Holocene 14, 21-33, Langdon and Barber (2005) Journal of Quaternary Science 20, 549-566
2011	Glen Garry		16-260 BC	W	-226	2226	2176	122	Unknown	Great Britain	Slethill	58.38	-3.83	peatland	Dacitic-Rhyolitic	Dugmore et al. (1995) The Holocene 5, 257-266
2011	Glen Garry		16-260 BC	W	-226	2226	2176	122	Unknown	Great Britain	Station Hill Altnabreac	58.38	-3.7	peatland	Dacitic-Rhyolitic	Dugmore et al. (1995) The Holocene 5, 257-266
2011	Glen Garry		16-260 BC	W	-226	2226	2176	122	Unknown	Great Britain	Temple Hill Moss	55.8367	-3.4178	peatland	Dacitic-Rhyolitic	Langdon and Barber (2004) The Holocene 14, 21-33, Langdon and Barber (2005) Journal of Quaternary Science 20, 549-566
2016	Glen Garry?		16-260 BC	W	-226	2226	2176	122	Unknown	Germany	Tiefer See	53.5929	12.5289	lake	Dacitic-Rhyolitic	Wulf et al. (2016) Quaternary Science Reviews 132, 1-14
2011	Glen Garry		16-260 BC	W	-226	2226	2176	122	Unknown	Great Britain	Tore Hill Moss	57.2407	-3.6668	peatland	Dacitic-Rhyolitic	Blundell and Barber (2005) Quaternary Science Reviews 24, 1261-1277, Barber et al. (2008) The Holocene 18, 31-43
2011	Glen Garry		16-260 BC	W	-226	2226	2176	122	Unknown	Great Britain	Walton Moss	54.9952	-2.7671	peatland	Dacitic-Rhyolitic	Barber et al. (2008)
2011	QUB-565/G2: Borge unknown 15		c. 100-500 BC	I	-300	2300	2250	200	Unknown	Scandinavia	Borge	68.2467	13.7417	peatland	Rhyolitic	Pilcher et al. (2005) Boreas 34, 136-156
2015	DCSH-2		465-365 cal BC	I	-415	2415	2365	50	Azores?	Ireland	Derrycunihy Wood	51.97	-9.6	woodland hollow	trachy-dacite	Reilly and Mitchell (2015) The Holocene 25, 241-252
2011	BMR-190		705-585 BC	W	-645	2645	2595	60	Hekla	Ireland	Barnsmore	54.7333	-7.9167	peatland	Dacitic	Pilcher et al. (1996) Journal of Quaternary Science 11, 485-494; Hall and Pilcher (2002) The Holocene 12, 223-230
2015	BMR-190		705-585 BC	W	-645	2645	2595	60	Hekla	Ireland	Camillan	52.0167	-9.53333	woodland hollow	Dacitic	Reilly and Mitchell (2015) The Holocene 25, 241-252
2011	BMR-190		705-585 BC	W	-645	2645	2595	60	Hekla	Ireland	Claraghmore	54.6309	-7.458	peatland	Dacitic	Plunkett et al. (2004) The Holocene 14, 780-786; Hall and Pilcher (2002) The Holocene 12, 223-230; Hall and Bunting (2001) Tephra-dated pollen studies of medieval landscapes in the north of Ireland. In: Gaelic Ireland c.1250-1650: land lordship and settlement. Four Courts Press Dublin, 207-222
2011	BMR-190		705-585 BC	W	-645	2645	2595	60	Hekla	Ireland	Garvaghullion	54.3793	-7.25732	peatland	Dacitic	Hall and Pilcher (2002) The Holocene 12, 223-230; Hall and Bunting (2001) Tephra-dated pollen studies of medieval landscapes in the north of Ireland. In: Gaelic Ireland c.1250-1650: land lordship and settlement. Four Courts Press Dublin, 207-222
2011	BMR-190		705-585 BC	W	-645	2645	2595	60	Hekla	Ireland	Glen West	54.4167	-8.0333	peatland	Dacitic	Swindles et al. (2007) Journal of Quaternary Science 22, 667-679; Plunkett et al. (2004) The Holocene 14, 780-786; Plunkett (1999) Environmental change in the Late Bronze Age in Ireland (1200-600 cal. BC). PhD thesis, Queen's University Belfast
2011	BMR-190		705-585 BC	W	-645	2645	2595	60	Hekla	Ireland	Lough Lurgeen	53.5798	-8.5134	lake	Dacitic	Plunkett (1999) Environmental change in the Late Bronze Age in Ireland (1200-600 cal. BC). PhD thesis, Queen's University Belfast
2011	BMR-190		705-585 BC	W	-645	2645	2595	60	Hekla	Ireland	Moyreen	52.5328	-9.179	peatland	Dacitic	Plunkett (2006) Journal of Quaternary Science 21, 9-16; Plunkett (1999) Environmental change in the Late Bronze Age in Ireland (1200-600 cal. BC). PhD thesis, Queen's University Belfast
2011	BMR-190		705-585 BC	W	-645	2645	2595	60	Hekla	Ireland	Owenduff	53.9643	-9.6915	peatland	Dacitic	Plunkett (2006) Journal of Quaternary Science 21, 9-16; Plunkett (1999) Environmental change in the Late Bronze Age in Ireland (1200-600 cal. BC). PhD thesis, Queen's University Belfast
2011	QUB490 Unknown Garry		710-641 BC	?	-675.5	2676	2626	34.5	Unknown	Ireland	Garry Bog	55.0833	-6.5667	peatland	Rhyolitic	Hall and Pilcher (2002) The Holocene 12, 223-230; Holmes (1998) A tephra-dated study of vegetation and climate change in the mid-Holocene of north-west Europe. PhD thesis, Queen's University Belfast; Plunkett (1999) Environmental change in the Late Bronze Age in Ireland (1200-600 cal. BC). PhD thesis, Queen's University Belfast
2011	BGMT3 = Microlite		730-664 BC	W	-697	2697	2647	33	Snæfellsjökull	Great Britain	Ben Gorm Moss	57.6046	-6.3206	peatland	Rhyolitic	Langdon and Barber (2001) Journal of Quaternary Science 16, 753-759, Langdon and Barber (2004) The Holocene 14, 21-33
2011	Microlite	= OMH-185 Population 1	755-680 BC	W	-717.5	2718	2668	37.5	Snæfellsjökull	Ireland	Barnsmore	54.7333	-7.9167	peatland	Rhyolitic	Pilcher et al. (1996) Journal of Quaternary Science 11, 485-494; Hall and Pilcher (2002) The Holocene 12, 223-230
2011	OMH-185 Population 2		755-680 BC	W	-717.5	2718	2668	37.5	Unknown	Ireland	Barnsmore	54.7333	-7.9167	peatland	Rhyolitic-Dacitic	Pilcher et al. (1996) Journal of Quaternary Science 11, 485-494; Hall and Pilcher (2002) The Holocene 12, 223-230
2011	Microlite	= OMH-185 Population 1	755-680 BC	W	-717.5	2718	2668	37.5	Snæfellsjökull	Ireland	Claraghmore	54.6309	-7.458	peatland	Rhyolitic	Plunkett et al. (2004) The Holocene 14, 780-786; Hall and Pilcher (2002) The Holocene 12, 223-230; Hall and Bunting (2001) Tephra-dated pollen studies of medieval landscapes in the north of Ireland. In: Gaelic Ireland c.1250-1650: land lordship and settlement. Four Courts Press Dublin, 207-222
2011	OMH-185 Population 2		755-680 BC	W	-717.5	2718	2668	37.5	Unknown	Ireland	Claraghmore	54.6309	-7.458	peatland	Rhyolitic-Dacitic	Plunkett et al. (2004) The Holocene 14, 780-786; Hall and Pilcher (2002) The Holocene 12, 223-230; Hall and Bunting (2001) Tephra-dated pollen studies of medieval landscapes in the north of Ireland. In: Gaelic Ireland c.1250-1650: land lordship and settlement. Four Courts Press Dublin, 207-222
2011	Microlite	= OMH-185 Population 1	755-680 BC	W	-717.5	2718	2668	37.5	Snæfellsjökull	Ireland	Dead Island	54.8867	-6.5491	peatland	Rhyolitic	Swindles et al. (2010) Quaternary Science Reviews 29, 1577-1589; Swindles and Roe (2006) Quaternary Newsletter 110, 2-9; Swindles (2006) Reconstruction of Holocene climate change from peatlands in the North of Ireland. PhD thesis, Queen's University Belfast
2011	Microlite	= DOM-6	755-680 BC	W	-717.5	2718	2668	37.5	Snæfellsjökull	Germany	Dosenmoor centre	54.1337	10.0269	peatland	Rhyolitic	van den Bogaard and Schmincke (2002) Journal of Quaternary Science 17, 3-20, van den Bogaard et al. (2002) Quaternary Research 57, 314-324
2011	Microlite	= DOM-6	755-680 BC	W	-717.5	2718	2668	37.5	Snæfellsjökull	Germany	Dosenmoor margin	54.1337	10.0269	peatland	Rhyolitic	van den Bogaard and Schmincke (2002) Journal of Quaternary Science 17, 3-20, van den Bogaard et al. (2002) Quaternary Research 57, 314-324
2011	Microlite	= OMH-185 Population 1	755-680 BC	W	-717.5	2718	2668	37.5	Snæfellsjökull	Ireland	Garry Bog	55.0833	-6.5667	peatland	Rhyolitic	Hall and Pilcher (2002) The Holocene 12, 223-230; Holmes (1998) A tephra-dated study of vegetation and climate change in the mid-Holocene of north-west Europe. PhD thesis, Queen's University Belfast, Plunkett (1999) Environmental change in the Late Bronze Age in Ireland (1200-600 cal. BC). PhD thesis, Queen's University Belfast
2011	OMH-185 Population 2		755-680 BC	W	-717.5	2718	2668	37.5	Unknown	Ireland	Garry Bog	55.0833	-6.5667	peatland	Rhyolitic-Dacitic	Hall and Pilcher (2002) The Holocene 12, 223-230; Holmes (1998) A tephra-dated study of vegetation and climate change in the mid-Holocene of north-west Europe. PhD thesis, Queen's University Belfast; Plunkett (1999) Environmental change in the Late Bronze Age in Ireland (1200-600 cal. BC). PhD thesis, Queen's University Belfast
2011	Microlite	= OMH-185 Population 1	755-680 BC	W	-717.5	2718	2668	37.5	Snæfellsjökull	Ireland	Garvaghullion	54.3793	-7.25732	peatland	Rhyolitic	Hall and Pilcher (2002) The Holocene 12, 223-230; Hall and Bunting (2001) Tephra-dated pollen studies of medieval landscapes in the north of Ireland. In: Gaelic Ireland c.1250-1650: land lordship and settlement. Four Courts Press Dublin, 207-222
2011	Microlite	= OMH-185 Population 1	755-680 BC	W	-717.5	2718	2668	37.5	Snæfellsjökull	Ireland	Glen West	54.4167	-8.0333	peatland	Rhyolitic	Swindles et al. (2007) Journal of Quaternary Science 22, 667-679; Plunkett et al. (2004) The Holocene 14, 780-786; Plunkett (1999) Environmental change in the Late Bronze Age in Ireland (1200-600 cal. BC). PhD thesis, Queen's University Belfast
2011	OMH-185 Population 2		755-680 BC	W	-717.5	2718	2668	37.5	Unknown	Ireland	Glen West	54.4167	-8.0333	peatland	Rhyolitic-Dacitic	Swindles et al. (2007) Journal of Quaternary Science 22, 667-679; Plunkett et al. (2004) The Holocene 14, 780-786; Plunkett (1999) Environmental change in the Late Bronze Age in Ireland (1200-600 cal. BC). PhD thesis, Queen's University Belfast
2011	Microlite	= DOM-6	755-680 BC	W	-717.5	2718	2668	37.5	Snæfellsjökull	Germany	Grambow	53.5973	11.2773	peatland	Rhyolitic	van den Bogaard and Schmincke (2002) Journal of Quaternary Science 17, 3-20, van den Bogaard et al. (2002) Quaternary Research 57, 314-324
2011	Microlite	= DOM-6	755-680 BC	W	-717.5	2718	2668	37.5	Snæfellsjökull	Germany	Jardelunde	54.822	9.2397	peatland	Rhyolitic	van den Bogaard and Schmincke (2002) Journal of Quaternary Science 17, 3-20, van den Bogaard et al. (2002) Quaternary Research 57, 314-324
2011	Microlite	= OMH-185 Population 1	755-680 BC	W	-717.5	2718	2668	37.5	Snæfellsjökull	Ireland	Lough Lurgeen	53.5798	-8.5134	lake	Rhyolitic	Plunkett (1999) Environmental change in the Late Bronze Age in Ireland (1200-600 cal. BC). PhD thesis, Queen's University Belfast
2011	Microlite	= OMH-185 Population 1	755-680 BC	W	-717.5	2718	2668	37.5	Snæfellsjökull	Ireland	Moyreen	52.5328	-9.179	peatland	Rhyolitic	Plunkett (2006) Journal of Quaternary Science 21, 9-16; Plunkett (1999) Environmental change in the Late Bronze Age in Ireland (1200-600 cal. BC). PhD thesis, Queen's University Belfast
2011	Microlite	= OMH-185 Population 1	755-680 BC	W	-717.5	2718	2668	37.5	Snæfellsjökull	Ireland	Owenduff	53.9643	-9.6915	peatland	Rhyolitic	Plunkett (2006) Journal of Quaternary Science 21, 9-16; Plunkett (1999) Environmental change in the Late Bronze Age in Ireland (1200-600 cal. BC). PhD thesis, Queen's University Belfast
2014	OMH-185 Population 2		755-680 BC	W	-717.5	2718	2668	37.5	Unknown	Great Britain	Ricksy Ball	51.1278	-3.84334	peatland	Rhyolitic-Dacitic	Fyfe et al. (2014) South West Water Report: http://www.southwestwater.co.uk/media/pdf/5/5/Vegetation_and_climate_change_on_Exmoor_Fyfe_et_al_2014.pdf.
2013	Microlite		755-680 BC	W	-717.5	2718	2668	37.5	Snæfellsjökull	Great Britain	Roman Lode	51.1294	-3.78347	peatland	Rhyolitic	Matthews et al. (2008) Roman Lode, Exmoor, Devon: Tephrochronology Scientific Dating Report. Research Department Report Series English Heritage
2011	Microlite	= OMH-185 Population 1	755-680 BC	W	-717.5	2718	2668	37.5	Snæfellsjökull	Ireland	Slieveanorra	55.0729	-6.2276	peatland	Rhyolitic	Swindles et al. (2010) Quaternary Science Reviews 29, 1577-1589; Swindles and Roe (2006) Quaternary Newsletter 110, 2-9; Swindles (2006) Reconstruction of Holocene climate change from peatlands in the North of Ireland. PhD thesis, Queen's University Belfast
2011	Microlite	= OMH-185 Population 1	755-680 BC	W	-717.5	2718	2668	37.5	Snæfellsjökull	Ireland	Sluggan	54.7667	-6.2833	peatland	Rhyolitic	Hall and Pilcher (2002) The Holocene 12, 223-230; Plunkett (2006) Journal of Quaternary Science 21, 9-16
2011	Gullbergby		2700 BP	I	-750	2750	2700		Torfajökull?	Scandinavia	Gullbergby	59.6406	18.4333	peatland	Rhyolitic	Wastegård (2005) Quaternary International 130, 49-62
2011	GB4-150 (~SILK-UN)		800-758 BC	W	-779	2779	2729	21	Katla	Ireland	Claraghmore	54.6309	-7.458	peatland	Dacitic-Trachydacitic	Plunkett et al. (2004) The Holocene 14, 780-786; Hall and Pilcher (2002) The Holocene 12, 223-230; Hall and Bunting (2001) Tephra-dated pollen studies of medieval landscapes in the north of Ireland. In: Gaelic Ireland c.1250-1650: land lordship and settlement. Four Courts Press Dublin, 207-222
2011	GB4-150 (~SILK-UN)		800-758 BC	W	-779	2779	2729	21	Katla	Ireland	Dead Island	54.8867	-6.5491	peatland	Dacitic-Trachydacitic	Swindles et al. (2010) Quaternary Science Reviews 29, 1577-1589; Swindles and Roe (2006) Quaternary Newsletter 110, 2-9; Swindles (2006) Reconstruction of Holocene climate change from peatlands in the North of Ireland. PhD thesis, Queen's University Belfast
2011	GB4-150 (~SILK-UN)		800-758 BC	W	-779	2779	2729	21	Katla	Ireland	Garry Bog	55.0833	-6.5667	peatland	Dacitic-Trachydacitic	Hall and Pilcher (2002) The Holocene 12, 223-230; Holmes (1998) A tephra-dated study of vegetation and climate change in the mid-Holocene of north-west Europe. PhD thesis, Queen's University Belfast; Plunkett (1999) Environmental change in the Late Bronze Age in Ireland (1200-600 cal. BC). PhD thesis, Queen's University Belfast
2011	GB4-150 (~SILK-UN)		800-758 BC	W	-779	2779	2729	21	Katla	Ireland	Glen West	54.4167	-8.0333	peatland	Dacitic-Trachydacitic	Swindles et al. (2007) Journal of Quaternary Science 22, 667-679; Plunkett et al. (2004) The Holocene 14, 780-786; Plunkett (1999) Environmental change in the Late Bronze Age in Ireland (1200-600 cal. BC). PhD thesis, Queen's University Belfast
2011	GB4-150 (~SILK-UN)		800-758 BC	W	-779	2779	2729	21	Katla	Ireland	Lough Lurgeen	53.5798	-8.5134	lake	Dacitic-Trachydacitic	Plunkett (1999) Environmental change in the Late Bronze Age in Ireland (1200-600 cal. BC). PhD thesis, Queen's University Belfast
2011	GB4-150 (~SILK-UN)		800-758 BC	W	-779	2779	2729	21	Katla	Ireland	Moyreen	52.5328	-9.179	peatland	Dacitic-Trachydacitic	Plunkett (2006) Journal of Quaternary Science 21, 9-16; Plunkett (1999) Environmental change in the Late Bronze Age in Ireland (1200-600 cal. BC). PhD thesis, Queen's University Belfast
2011	GB4-150 (~SILK-UN)		800-758 BC	W	-779	2779	2729	21	Katla	Ireland	Owenduff	53.9643	-9.6915	peatland	Dacitic-Trachydacitic	Plunkett (2006) Journal of Quaternary Science 21, 9-16; Plunkett (1999) Environmental change in the Late Bronze Age in Ireland (1200-600 cal. BC). PhD thesis, Queen's University Belfast
2011	GB4-150 (~SILK-UN)		800-758 BC	W	-779	2779	2729	21	Katla	Ireland	Slieveanorra	55.0729	-6.2276	peatland	Dacitic-Trachydacitic	Swindles et al. (2010) Quaternary Science Reviews 29, 1577-1589; Swindles and Roe (2006) Quaternary Newsletter 110, 2-9; Swindles (2006) Reconstruction of Holocene climate change from peatlands in the North of Ireland. PhD thesis, Queen's University Belfast
2011	Hekla 3		1087-1006 BC	W	-1046.5	3046	2996	40.5	Hekla	Faroes	Brúnavatn	62.07	-6.85	lake	Dacitic-Rhyolitic	Olsen et al. (2010) Quaternary Science Reviews 29, 2764-2780
2011	Hekla 3		1087-1006 BC	W	-1046.5	3046	2996	40.5	Hekla	Ireland	Claraghmore	54.6309	-7.458	peatland	Dacitic-Rhyolitic	Plunkett et al. (2004) The Holocene 14, 780-786; Hall and Pilcher (2002) The Holocene 12, 223-230; Hall and Bunting (2001) Tephra-dated pollen studies of medieval landscapes in the north of Ireland. In: Gaelic Ireland c.1250-1650: land lordship and settlement. Four Courts Press Dublin, 207-222
2015	Hekla 3		1087-1006 BC	W	-1046.5	3046	2996	40.5	Hekla	Scandinavia	Degerö Stormyr	64.181	19.564	peatland	Dacitic-Rhyolitic	Watson et al. (2016) Quaternary Science Reviews 139, 110-128
2011	Hekla 3	= DOM-7	1087-1006 BC	W	-1046.5	3046	2996	40.5	Hekla	Germany	Dosenmoor centre	54.1337	10.0269	peatland	Dacitic-Rhyolitic	van den Bogaard and Schmincke (2002) Journal of Quaternary Science 17, 3-20, van den Bogaard et al. (2002) Quaternary Research 57, 314-324
2011	Hekla 3	= DOM-7	1087-1006 BC	W	-1046.5	3046	2996	40.5	Hekla	Germany	Dosenmoor margin	54.1337	10.0269	peatland	Dacitic-Rhyolitic	van den Bogaard and Schmincke (2002) Journal of Quaternary Science 17, 3-20, van den Bogaard et al. (2002) Quaternary Research 57, 314-324
2011	Hekla 3		1087-1006 BC	W	-1046.5	3046	2996	40.5	Hekla	Scandinavia	Fågelmossen	59.5333	12.1667	peatland	Dacitic-Rhyolitic	Wastegård et al. (2008) The Holocene 18, 539-549
2011	Hekla 3		1087-1006 BC	W	-1046.5	3046	2996	40.5	Hekla	Scandinavia	Furskogstjärnet	59.3833	12.0833	lake	Dacitic-Rhyolitic	Wastegård (2005) Quaternary International 130, 49-62
2011	Hekla 3	= DOM-7	1087-1006 BC	W	-1046.5	3046	2996	40.5	Hekla	Germany	Jardelunde	54.822	9.2397	peatland	Dacitic-Rhyolitic	van den Bogaard and Schmincke (2002) Journal of Quaternary Science 17, 3-20, van den Bogaard et al. (2002) Quaternary Research 57, 314-324
2011	Hekla 3		1087-1006 BC	W	-1046.5	3046	2996	40.5	Hekla	Scandinavia	Klocka Bog	63.3083	12.4833	peatland	Dacitic-Rhyolitic	Bergman et al. (2004) Journal of Quaternary Science 19, 241-249
2011	Hekla 3		1087-1006 BC	W	-1046.5	3046	2996	40.5	Hekla	Scandinavia	Kortlandamossen	59.8458	12.2639	peatland	Dacitic-Rhyolitic	Boygle (2004) Journal of Quaternary Science 19, 103-109
2011	Hekla 3		1087-1006 BC	W	-1046.5	3046	2996	40.5	Hekla	Scandinavia	Mosstakanmossen	59.625	12.1333	peatland	Dacitic-Rhyolitic	Boygle (2004) Journal of Quaternary Science 19, 103-109
2011	Hekla 3		1087-1006 BC	W	-1046.5	3046	2996	40.5	Hekla	Scandinavia	Mötterudstjärnet	59.6333	12.6667	lake	Dacitic-Rhyolitic	Zillén et al. (2002) Quaternary Science Reviews 21, 1583-1591
2011	Hekla 3		1087-1006 BC	W	-1046.5	3046	2996	40.5	Hekla	Scandinavia	Stömyren	60.3887	13.259	peatland	Dacitic-Rhyolitic	Wastegård (2005) Quaternary International 130, 49-62
2011	Hekla 3		1087-1006 BC	W	-1046.5	3046	2996	40.5	Hekla	Scandinavia	Ulvåmossen	60.2056	12.6583	peatland	Dacitic-Rhyolitic	Boygle (2004) Journal of Quaternary Science 19, 103-109
2011	GB4-182		c. 1350 BC	I	-1350	3350	3300		Unknown	Ireland	Garry Bog	55.0833	-6.5667	peatland	Rhyolitic	Hall and Pilcher (2002) The Holocene 12, 223-230; Holmes (1998) A tephra-dated study of vegetation and climate change in the mid-Holocene of north-west Europe. PhD thesis, Queen's University Belfast; Plunkett (1999) Environmental change in the Late Bronze Age in Ireland (1200-600 cal. BC). PhD thesis, Queen's University Belfast
2011	LBA-2 ?= Sn-2 = "x" tephra of Dyngjufjöll region		3550-3650 BP	W	-1650	3650	3600	50	Snæfellsjökull	Scandinavia	Lilla Backsjömyren	62.6856	14.5406	peatland	trachy-dacite	Wastegård et al. (2009) GFF 131, 293-297
2015	Hekla-S/Kebister		1800-1750 BC	W	-1775	3770	3725	25	Hekla	Scandinavia	Degerö Stormyr	64.181	19.564	peatland	Dacitic-Rhyolitic	Watson et al. (2016) Quaternary Science Reviews 139, 110-128
2011	Hekla-S/Kebister		1800-1750 BC	W	-1775	3770	3720	25	Hekla	Scandinavia	Fågelmossen	59.5333	12.1667	peatland	Dacitic-Rhyolitic	Wastegård et al. (2008) The Holocene 18, 539-549
2011	Hekla-S/Kebister		1800-1750 BC	W	-1775	3770	3720	25	Hekla	Scandinavia	Furskogstjärnet	59.3833	12.0833	lake	Dacitic-Rhyolitic	Wastegård (2005) Quaternary International 130, 49-62
2011	Hekla-S/Kebister		1800-1750 BC	W	-1775	3770	3720	25	Hekla	Scandinavia	Klocka Bog	63.3083	12.4833	peatland	Dacitic-Rhyolitic	Bergman et al. (2004) Journal of Quaternary Science 19, 241-249
2011	Hekla-S/Kebister		1800-1750 BC	W	-1775	3770	3720	25	Hekla	Scandinavia	Kortlandamossen	59.8458	12.2639	peatland	Dacitic-Rhyolitic	Boygle (2004) Journal of Quaternary Science 19, 103-109
2011	Hekla-S/Kebister		1800-1750 BC	W	-1775	3770	3720	25	Hekla	Scandinavia	Mosstakanmossen	59.625	12.1333	peatland	Dacitic-Rhyolitic	Boygle (2004) Journal of Quaternary Science 19, 103-109
2011	Hekla-S/Kebister		1800-1750 BC	W	-1775	3770	3720	25	Hekla	Scandinavia	Mötterudstjärnet	59.6333	12.6667	lake	Dacitic-Rhyolitic	Zillén et al. (2002) Quaternary Science Reviews 21, 1583-1591
2011	Hekla-S/Kebister		1800-1750 BC	W	-1775	3770	3720	25	Hekla	Scandinavia	Mustjärve	59.0781	24.1086	peatland	Dacitic-Rhyolitic	Hang et al. (2006) Boreas 35, 644-649
2011	Hekla-S/Kebister		1800-1750 BC	W	-1775	3770	3720	25	Hekla	Scandinavia	Stömyren	60.3887	13.259	peatland	Dacitic-Rhyolitic	Wastegård (2005) Quaternary International 130, 49-62
2011	Hekla-S/Kebister		1800-1750 BC	W	-1775	3770	3720	25	Hekla	Scandinavia	Vallmyren	62.7167	14.7167	peatland	Dacitic-Rhyolitic	Wastegård et al. (2008) The Holocene 18, 539-549
2011	Hekla-S/Kebister		1800-1750 BC	W	-1775	3775	3725	25	Hekla	Faroes	Brúnavatn	62.07	-6.85	lake	Dacitic-Rhyolitic	Olsen et al. (2010) Quaternary Science Reviews 29, 2764-2780
2011	Hekla-S/Kebister	= DOM-8	1800-1750 BC	W	-1775	3775	3725	25	Hekla	Germany	Dosenmoor centre	54.1337	10.0269	peatland	Dacitic-Rhyolitic	van den Bogaard and Schmincke (2002) Journal of Quaternary Science 17, 3-20, van den Bogaard et al. (2002) Quaternary Research 57, 314-324
2011	Hekla-S/Kebister	= DOM-8	1800-1750 BC	W	-1775	3775	3725	25	Hekla	Germany	Dosenmoor margin	54.1337	10.0269	peatland	Dacitic-Rhyolitic	van den Bogaard and Schmincke (2002) Journal of Quaternary Science 17, 3-20, van den Bogaard et al. (2002) Quaternary Research 57, 314-324
2011	Hekla-S/Kebister		1800-1750 BC	W	-1775	3775	3725	25	Hekla	Great Britain	Kebister	60.18	-1.16	peatland	Dacitic-Rhyolitic	Dugmore et al. (1995) The Holocene 5, 257-266
2011	Hekla-S/Kebister		1800-1750 BC	W	-1775	3775	3725	25	Hekla	Faroes	Millum Vatna	61.8217	-6.745	peatland	Dacitic-Rhyolitic	Lawson et al. (2008) Journal of Biogeography 35, 1130-1152
2011	Hekla-S/Kebister		1800-1750 BC	W	-1775	3775	3725	25	Hekla	Faroes	Mjáuvøtn	62.1333	-7	lake	Dacitic-Rhyolitic	Wastegård et al. (2001) The Holocene 11, 101-109
2011	Hekla-S/Kebister		1800-1750 BC	W	-1775	3775	3725	25	Hekla	Faroes	Skaelingsvatn	62.02	6.833	peatland	Dacitic-Rhyolitic	Dugmore and Newton (1997) Frodskaparrit 45, 141-154
2011	Hekla-S/Kebister		1800-1750 BC	W	-1775	3775	3725	25	Hekla	Faroes	Starvatn	62.1	-6.7333	lake	Dacitic-Rhyolitic	Andresen et al. (2006) Boreas 35, 23-34, Wastegård et al. (2008) The Holocene 18, 539-549
2011	Hekla-S/Kebister		1800-1750 BC	W	-1775	3775	3725	25	Hekla	Faroes	Stóravatn	62.07	-6.85	lake	Dacitic-Rhyolitic	Olsen et al. (2010) Quaternary Science Reviews 29, 2764-2780
2011	Hekla-S/Kebister		1800-1750 BC	W	-1775	3775	3725	25	Hekla	Great Britain	Unst	60.718	-0.951	peatland	Dacitic-Rhyolitic	Swindles et al. (2013) The Holocene 23, 1493-1501
2011	Unknown		c. 2050 BC	R	-2050	4050	4000		Unknown	Ireland	Croaghaun East	54.1921	-9.4556	peatland	Rhyolitic-Dacitic	Dwyer and Mitchell (1997) The Holocene 7, 113-118
2011	Hekla 4		2395-2279 BC	W	-2337	4337	4287	58	Hekla	Great Britain	Achany Glen	57.983	-4.396	peatland	Rhyolitic	Dugmore et al. (1996) Journal of Quaternary Science 11, 511-516
2011	Hekla 4		2395-2279 BC	W	-2337	4337	4287	58	Hekla	Great Britain	Altnabreac	58.37	-3.68	peatland	Rhyolitic	Dugmore et al. (1989) Scottish Geographical Magazine 105, 168-172
2011	Hekla 4		2395-2279 BC	W	-2337	4337	4287	58	Hekla	Scandinavia	Ängstugsmossen	58.2	14.9	peatland	Dacitic-Rhyolitic	Wastegård (2005) Quaternary International 130, 49-62
2011	Hekla 4		2395-2279 BC	W	-2337	4337	4287	58	Hekla	Ireland	Ballynahone	54.7833	-6.63333	peatland	Rhyolitic	Pilcher et al. (1996) Journal of Quaternary Science 11, 485-494; Holmes (1998) A tephra-dated study of vegetation and climate change in the mid-Holocene of north-west Europe. PhD thesis, Queen's University Belfast; Hall and Pilcher (2002) The Holocene 12, 223-230; Swindles (unpublished data)
2011	Hekla 4		2395-2279 BC	W	-2337	4337	4287	58	Hekla	Great Britain	Ben Gorm Moss	57.6046	-6.3206	peatland	Rhyolitic	Langdon and Barber (2001) Journal of Quaternary Science 16, 753-759, Langdon and Barber (2004) The Holocene 14, 21-33
2011	BGMT-4 (= Silk-N2)		~2395-2279 BC	A	-2337	4337	4287	58	Katla	Great Britain	Ben Gorm Moss	57.6046	-6.3206	peatland	Dacitic	Langdon and Barber (2001) Journal of Quaternary Science 16, 753-759, Langdon and Barber (2004) The Holocene 14, 21-33
2011	Hekla 4		2395-2279 BC	W	-2337	4337	4287	58	Hekla	Scandinavia	Bødalsvatnett	68.3187	13.9407	lake	Dacitic-Rhyolitic	Pilcher et al. (2005) Boreas 34, 136-156
2011	Hekla 4		2395-2279 BC	W	-2337	4337	4287	58	Hekla	Scandinavia	Borge	68.2467	13.7417	peatland	Dacitic-Rhyolitic	Pilcher et al. (2005) Boreas 34, 136-156
2011	Hekla 4		2395-2279 BC	W	-2337	4337	4287	58	Hekla	Faroes	Brúnavatn	62.07	-6.85	lake	Dacitic-Rhyolitic	Olsen et al. (2010) Quaternary Science Reviews 29, 2764-2780
2011	Hekla 4		2395-2279 BC	W	-2337	4337	4287	58	Hekla	Ireland	Claraghmore	54.6309	-7.458	peatland	Rhyolitic	Watson et al (2016) Quaternary Science Reviews 139, 110-128; Plunkett et al. (2004) The Holocene 14, 780-786; Hall and Pilcher (2002) The Holocene 12, 223-230; Hall and Bunting (2001) Tephra-dated pollen studies of medieval landscapes in the north of Ireland. In: Gaelic Ireland c.1250-1650: land lordship and settlement. Four Courts Press Dublin, 207-222
2015	Hekla 4		2395-2279 BC	W	-2337	4337	4287	58	Hekla	Ireland	Claraghmore lough	54.631	-7.45	lake	Rhyolitic-Dacitic	Watson et al (2016) Quaternary Science Reviews 139, 110-128
2011	Hekla 4		2395-2279 BC	W	-2337	4337	4287	58	Hekla	Great Britain	Craigmaud Moss	57.61	-2.194	peatland	Rhyolitic	Langdon and Barber (2004) The Holocene 14, 21-33, Langdon and Barber (2005) Journal of Quaternary Science 20, 549-566
2011	Hekla 4		2395-2279 BC	W	-2337	4337	4287	58	Hekla	Ireland	Dead Island	54.8867	-6.5491	peatland	Rhyolitic	Swindles et al. (2010) Quaternary Science Reviews 29, 1577-1589; Swindles and Roe (2006) Quaternary Newsletter 110, 2-9; Swindles (2006) Reconstruction of Holocene climate change from peatlands in the North of Ireland. PhD thesis, Queen's University Belfast
2015	Hekla 4		2395-2279 BC	W	-2337	4337	4287	58	Hekla	Scandinavia	Degerö Stormyr	64.181	19.564	peatland	Rhyolitic-Dacitic	Watson et al. (2016) Quaternary Science Reviews 139, 110-128
2011	Hekla 4		2395-2279 BC	W	-2337	4337	4287	58	Hekla	Ireland	Derryloughan	54.3156	-6.35834	peatland	Rhyolitic	Hall and Pilcher (2002) The Holocene 12, 223-230
2011	Hekla 4	= DOM-9	2395-2279 BC	W	-2337	4337	4287	58	Hekla	Germany	Dosenmoor centre	54.1337	10.0269	peatland	Rhyolitic	van den Bogaard and Schmincke (2002) Journal of Quaternary Science 17, 3-20, van den Bogaard et al. (2002) Quaternary Research 57, 314-324
2011	Hekla 4	= DOM-9	2395-2279 BC	W	-2337	4337	4287	58	Hekla	Germany	Dosenmoor margin	54.1337	10.0269	peatland	Rhyolitic	van den Bogaard and Schmincke (2002) Journal of Quaternary Science 17, 3-20, van den Bogaard et al. (2002) Quaternary Research 57, 314-324
2011	Hekla 4		2395-2279 BC	W	-2337	4337	4287	58	Hekla	Faroes	Eiði	62.3	-7.0833	lake drained 1920s	Dacitic-Rhyolitic	Wastegård et al. (2001) The Holocene 11, 101-109
2014	Hekla 4		2395-2279 BC	W	-2337	4337	4287	58	Hekla	Ireland	Fallahogy	54.75	-6.6	peatland	Rhyolitic	Roland et al. (2014) Quaternary Science Reviews 83, 11-27
2011	Hekla 4		2395-2279 BC	W	-2337	4337	4287	58	Hekla	Great Britain	Fenton Cottage	53.896	-2.908	peatland	Rhyolitic	Pilcher and Hall (1996) The Holocene 6, 100-105, Wells et al. (1997) Vegetation History and Archaeobotany 6, 153-166
2011	Hekla 4		2395-2279 BC	W	-2337	4337	4287	58	Hekla	Great Britain	Fleet Moss	54.246	-2.213	peatland	Rhyolitic	Pilcher and Hall (1996) The Holocene 6, 100-105
2011	Hekla 4		2395-2279 BC	W	-2337	4337	4287	58	Hekla	Scandinavia	Furskogstjärnet	59.3833	12.0833	lake	Dacitic-Rhyolitic	Wastegård (2005) Quaternary International 130, 49-62
2011	Hekla 4		2395-2279 BC	W	-2337	4337	4287	58	Hekla	Ireland	Garry Bog	55.0833	-6.5667	peatland	Rhyolitic	Hall and Pilcher (2002) The Holocene 12, 223-230; Hall et al. (1994) The Holocene 4, 79-83; Pilcher et al. (1996) Journal of Quaternary Science 11, 485-494; Holmes (1998) A tephra-dated study of vegetation and climate change in the mid-Holocene of north-west Europe. PhD thesis, Queen's University Belfast; Plunkett (1999) Environmental change in the Late Bronze Age in Ireland (1200-600 cal. BC). P…
2011	Hekla 4		2395-2279 BC	W	-2337	4337	4287	58	Hekla	Ireland	Glen West	54.4167	-8.0333	peatland	Rhyolitic	Swindles et al. (2007) Journal of Quaternary Science 22, 667-679; Plunkett et al. (2004) The Holocene 14, 780-786; Plunkett (1999) Environmental change in the Late Bronze Age in Ireland (1200-600 cal. BC). PhD thesis, Queen's University Belfast
2011	SILK-N2?		~2395-2279 BC	A	-2337	4337	4287	58	Katla	Ireland	Glen West	54.4167	-8.0333	peatland	Dacitic-Trachydacitic	Swindles et al. (2007) Journal of Quaternary Science 22, 667-679; Plunkett et al. (2004) The Holocene 14, 780-786; Plunkett (1999) Environmental change in the Late Bronze Age in Ireland (1200-600 cal. BC). PhD thesis, Queen's University Belfast
2011	Hekla 4		2395-2279 BC	W	-2337	4337	4287	58	Hekla	Great Britain	Hoy	58.812	-3.267	peatland	Rhyolitic	Dugmore et al. (1995) The Holocene 5, 257-266
2011	Hekla 4	= DOM-9	2395-2279 BC	W	-2337	4337	4287	58	Hekla	Germany	Jardelunde	54.822	9.2397	peatland	Rhyolitic	van den Bogaard and Schmincke (2002) Journal of Quaternary Science 17, 3-20, van den Bogaard et al. (2002) Quaternary Research 57, 314-324
2011	Hekla 4		2395-2279 BC	W	-2337	4337	4287	58	Hekla	Great Britain	Kebister	60.18	-1.16	peatland	Rhyolitic	Dugmore et al. (1995) The Holocene 5, 257-266
2011	Hekla 4		2395-2279 BC	W	-2337	4337	4287	58	Hekla	Scandinavia	Klocka Bog	63.3083	12.4833	peatland	Dacitic-Rhyolitic	Bergman et al. (2004) Journal of Quaternary Science 19, 241-249
2011	Hekla 4		2395-2279 BC	W	-2337	4337	4287	58	Hekla	Scandinavia	Kortlandamossen	59.8458	12.2639	peatland	Dacitic-Rhyolitic	Boygle (2004) Journal of Quaternary Science 19, 103-109
2011	Hekla 4		2395-2279 BC	W	-2337	4337	4287	58	Hekla	Great Britain	Lairg	57.98	-4.39	peatland	Rhyolitic	Dugmore et al. (1995) The Holocene 5, 257-266
2011	Hekla 4		2395-2279 BC	W	-2337	4337	4287	58	Hekla	Great Britain	Loch Farlary	58.016	-4.075	lake	Rhyolitic	Tipping et al. (2008) Journal of Archaeological Science 35, 2379–2386
2011	Hekla 4		2395-2279 BC	W	-2337	4337	4287	58	Hekla	Great Britain	Loch Leer	58.36	-3.78	lake	Rhyolitic	Dugmore et al. (1995) The Holocene 5, 257-266
2011	Hekla 4		2395-2279 BC	W	-2337	4337	4287	58	Hekla	Great Britain	Longbridge Moss	55.01	-3.08489	peatland	Rhyolitic	Langdon and Barber (2004) The Holocene 14, 21-33
2015	Hekla 4		2395-2279 BC	W	-2337	4337	4287	58	Hekla	Great Britain	Malham Tarn Moss	54.097	-2.173	peatland	Rhyolitic-Dacitic	Watson et al. (2016) Quaternary Science Reviews 139, 110-128
2011	Hekla 4		2395-2279 BC	W	-2337	4337	4287	58	Hekla	Ireland	Malin Head	55.2833	-7.25	peatland	Rhyolitic	Pilcher et al. (1996) Journal of Quaternary Science 11, 485-494; Hall and Pilcher (2002) The Holocene 12, 223-230
2011	Hekla 4		2395-2279 BC	W	-2337	4337	4287	58	Hekla	Great Britain	Mallachie Moss	57.225	-4.1663	peatland	Rhyolitic	Langdon and Barber (2004) The Holocene 14, 21-33, Langdon and Barber (2005) Journal of Quaternary Science 20, 549-566
2011	Hekla 4		2395-2279 BC	W	-2337	4337	4287	58	Hekla	Faroes	Mjáuvøtn	62.1333	-7	lake	Dacitic-Rhyolitic	Wastegård et al. (2001) The Holocene 11, 101-109
2011	Hekla 4		2395-2279 BC	W	-2337	4337	4287	58	Hekla	Scandinavia	Mötterudstjärnet	59.6333	12.6667	lake	Dacitic-Rhyolitic	Zillén et al. (2002) Quaternary Science Reviews 21, 1583-1591
2011	Hekla 4		2395-2279 BC	W	-2337	4337	4287	58	Hekla	Scandinavia	Mustjärve	59.0781	24.1086	peatland	Dacitic-Rhyolitic	Hang et al. (2006) Boreas 35, 644-649
2011	Hekla 4		2395-2279 BC	W	-2337	4337	4287	58	Hekla	Great Britain	New Pitsligo	57.592	-2.1333	peatland	Rhyolitic	Dugmore et al. (1995) The Holocene 5, 257-266
2015	Hekla 4		2395-2279 BC	W	-2337	4337	4287	58	Hekla	Scandinavia	Sammakovuoma lake	66.992	21.5	lake	Rhyolitic-Dacitic	Watson et al. (2016) Quaternary Science Reviews 139, 110-128
2011	Hekla 4		2395-2279 BC	W	-2337	4337	4287	58	Hekla	Scandinavia	Sellevoll (aka Sellevollmyra)	69.1083	15.9417	peatland	Dacitic-Rhyolitic	Vorren et al. (2007) Boreas 36, 253-277
2011	Hekla 4		2395-2279 BC	W	-2337	4337	4287	58	Hekla	Faroes	Skaelingsvatn	62.02	6.833	peatland	Dacitic-Rhyolitic	Dugmore and Newton (1997) Frodskaparrit 45, 141-154
2011	Hekla 4		2395-2279 BC	W	-2337	4337	4287	58	Hekla	Great Britain	Slethill	58.38	-3.83	peatland	Rhyolitic	Dugmore et al. (1995) The Holocene 5, 257-266
2011	Hekla 4		2395-2279 BC	W	-2337	4337	4287	58	Hekla	Ireland	Slieveanorra	55.0729	-6.2276	peatland	Rhyolitic	Swindles et al. (2010) Quaternary Science Reviews 29, 1577-1589; Swindles and Roe (2006) Quaternary Newsletter 110, 2-9; Swindles (2006) Reconstruction of Holocene climate change from peatlands in the North of Ireland. PhD thesis, Queen's University Belfast
2011	Hekla 4		2395-2279 BC	W	-2337	4337	4287	58	Hekla	Ireland	Sluggan	54.7667	-6.2833	peatland	Rhyolitic	Hall and Pilcher (2002) The Holocene 12, 223-230; Plunkett (2006) Journal of Quaternary Science 21, 9-16; Pilcher et al. (1995) The Holocene 5, 103-110; Hall et al. (1994) The Holocene 4, 79-83
2011	Hekla 4		2395-2279 BC	W	-2337	4337	4287	58	Hekla	Great Britain	Station Hill Altnabreac	58.38	-3.7	peatland	Rhyolitic	Dugmore et al. (1995) The Holocene 5, 257-266
2011	Hekla 4		2395-2279 BC	W	-2337	4337	4287	58	Hekla	Scandinavia	Stömyren	60.3887	13.259	peatland	Dacitic-Rhyolitic	Wastegård (2005) Quaternary International 130, 49-62
2011	Hekla 4		2395-2279 BC	W	-2337	4337	4287	58	Hekla	Faroes	Stóravatn	62.07	-6.85	lake	Dacitic-Rhyolitic	Olsen et al. (2010) Quaternary Science Reviews 29, 2764-2780
2015	Hekla 4		2395-2279 BC	W	-2337	4337	4287	58	Hekla	Scandinavia	Svartkälsjärn lake	64.264	19.552	lake	Rhyolitic-Dacitic	Watson et al. (2016) Quaternary Science Reviews 139, 110-128
2016	Hekla 4		2395-2279 BC	W	-2337	4337	4287	58	Hekla	Germany	Tiefer See	53.5929	12.5289	lake	Rhyolitic-Dacitic	Wulf et al. (2016) Quaternary Science Reviews 132, 1-14
2011	Hekla 4		2395-2279 BC	W	-2337	4337	4287	58	Hekla	Scandinavia	Ulvåmossen	60.2056	12.6583	peatland	Dacitic-Rhyolitic	Boygle (2004) Journal of Quaternary Science 19, 103-109
2011	Hekla 4		2395-2279 BC	W	-2337	4337	4287	58	Hekla	Ireland	West Corlea	53.6	-7.8667	peatland	Rhyolitic	Caseldine et al. (1998) The Holocene 8, 105-111
2011	Mjáuvøtn A		4718-4583 BC	I	-3550	5550	5500	67.5	Unknown	Faroes	Brúnavatn	62.07	-6.85	lake	Basaltic	Olsen et al. (2010) Quaternary Science Reviews 29, 2764-2780
2011	Mjáuvøtn A		6668-6533 BP	I	-3550	5550	5500	67.5	Unknown	Faroes	Eiði	62.3	-7.0833	lake drained 1920s	Basaltic	Wastegård et al. (2001) The Holocene 11, 101-109
2011	Mjáuvøtn A		6668-6533 BP	I	-3550	5550	5500	67.5	Unknown	Faroes	Mjáuvøtn	62.1333	-7	lake	Basaltic	Wastegård et al. (2001) The Holocene 11, 101-109
2011	QUB-598/G1: Borge unknown 16		c. 3850 BC	I	-3850	5850	5800		Unknown	Scandinavia	Borge	68.2467	13.7417	peatland	Rhyolitic	Pilcher et al. (2005) Boreas 34, 136-156
2011	QUB-598/G3: Borge unknown 17		c. 3850 BC	I	-3850	5850	5800		Unknown	Scandinavia	Borge	68.2467	13.7417	peatland	Trachyte-Trachydacitic	Pilcher et al. (2005) Boreas 34, 136-156
2011	QUB-598/G5: Borge unknown 18		c. 3850 BC	I	-3850	5850	5800		Unknown	Scandinavia	Borge	68.2467	13.7417	peatland	Dacitic	Pilcher et al. (2005) Boreas 34, 136-156
2011	Hov		4240-3770 BC	R	-4005	6005	5955	235	Grímsvötn	Faroes	Hovsdalur	61.5	-6.6833	peatland	Basaltic	Wastegård (2002) Journal of Quaternary Science 17, 723-730
2011	SILK A1 (?)		4240-3770 BC	R	-4005	6005	5955	235	Katla	Faroes	Hovsdalur	61.5	-6.6833	peatland	Dacitic	Wastegård (2002) Journal of Quaternary Science 17, 723-730
2011	QUB-600/G1: Borge unknown 20		c. 4420 BC	I	-4420	6420	6370		Unknown	Scandinavia	Borge	68.2467	13.7417	peatland	Dacitic-Rhyolitic	Pilcher et al. (2005) Boreas 34, 136-156
2011	QUB-600/G2: Borge unknown 21		c. 4420 BC	I	-4420	6420	6370		Unknown	Scandinavia	Borge	68.2467	13.7417	peatland	Rhyolitic	Pilcher et al. (2005) Boreas 34, 136-156
2011	Hoy		4620-4230 BC	R	-4425	6425	6375	195	Torfajökull	Ireland	An Loch Mór	53.0667	-9.5056	lake	Rhyolitic	Chambers et al. (2004) The Holocene 14, 703-720
2011	Hoy		4620-4230 BC	R	-4425	6425	6375	195	Torfajökull	Ireland	Ballynahone	54.7833	-6.63333	peatland	Rhyolitic	Pilcher et al. (1996) Journal of Quaternary Science 11, 485-494; Holmes (1998) A tephra-dated study of vegetation and climate change in the mid-Holocene of north-west Europe. PhD thesis, Queen's University Belfast; Hall and Pilcher (2002) The Holocene 12, 223-230; Swindles (unpublished data)
2011	Hoy		4620-4230 BC	R	-4425	6425	6375	195	Torfajökull	Ireland	Garvaghullion	54.3793	-7.25732	peatland	Rhyolitic	Hall and Pilcher (2002) The Holocene 12, 223-230; Hall and Bunting (2001) Tephra-dated pollen studies of medieval landscapes in the north of Ireland. In: Gaelic Ireland c.1250-1650: land lordship and settlement. Four Courts Press Dublin, 207-222
2011	Hoy		4620-4230 BC	R	-4425	6425	6375	195	Torfajökull	Great Britain	Hoy	58.812	-3.267	peatland	Rhyolitic	Dugmore et al. (1995) The Holocene 5, 257-266
2011	Hoy		4620-4230 BC	R	-4425	6425	6375	195	Torfajökull	Great Britain	Loch Farlary	58.016	-4.075	lake	Rhyolitic	Tipping et al. (2008) Journal of Archaeological Science 35, 2379–2386
2011	QUB-601/G1: Borge unknown 22		c. 4700 BC	I	-4700	6700	6650		Unknown	Scandinavia	Borge	68.2467	13.7417	peatland	Rhyolitic	Pilcher et al. (2005) Boreas 34, 136-156
2011	QUB-601/G2: Borge unknown 23		c. 4700 BC	I	-4700	6700	6650		Unknown	Scandinavia	Borge	68.2467	13.7417	peatland	Rhyolitic	Pilcher et al. (2005) Boreas 34, 136-156
2011	Lairg B		4774-4677 BC	W	-4725.5	6726	6676	48.5	Torfajökull	Ireland	An Loch Mór	53.0667	-9.5056	lake	Rhyolitic	Chambers et al. (2004) The Holocene 14, 703-720
2011	Lairg B		4774-4677 BC	W	-4725.5	6726	6676	48.5	Torfajökull	Ireland	Ballynahone	54.7833	-6.63333	peatland	Rhyolitic	Pilcher et al. (1996) Journal of Quaternary Science 11, 485-494; Holmes (1998) A tephra-dated study of vegetation and climate change in the mid-Holocene of north-west Europe. PhD thesis, Queen's University Belfast; Hall and Pilcher (2002) The Holocene 12, 223-230; Swindles (unpublished data)
2015	Lairg B		4774-4677 BC	W	-4725.5	6726	6676	48.5	Torfajökull	Ireland	Claraghmore lough	54.631	-7.45	lake	Rhyolitic	Watson et al (2016) Quaternary Science Reviews 139, 110-128
2011	Lairg B		4774-4677 BC	W	-4725.5	6726	6676	48.5	Torfajökull	Ireland	Fallahogy	54.75	-6.6	peatland	Rhyolitic	Hall (2003) The Holocene 13, 131-138
2011	Lairg B		4774-4677 BC	W	-4725.5	6726	6676	48.5	Torfajökull	Ireland	Garry Bog	55.0833	-6.5667	peatland	Rhyolitic	Hall and Pilcher (2002) The Holocene 12, 223-230; Pilcher et al. (1996) Journal of Quaternary Science 11, 485-494; Holmes (1998) A tephra-dated study of vegetation and climate change in the mid-Holocene of north-west Europe. PhD thesis, Queen's University Belfast; Plunkett (1999) Environmental change in the Late Bronze Age in Ireland (1200-600 cal. BC). PhD thesis, Queen's University Belfast
2011	Lairg B		4774-4677 BC	W	-4725.5	6726	6676	48.5	Torfajökull	Ireland	Garvaghullion	54.3793	-7.25732	peatland	Rhyolitic	Hall and Pilcher (2002) The Holocene 12, 223-230; Hall and Bunting (2001) Tephra-dated pollen studies of medieval landscapes in the north of Ireland. In: Gaelic Ireland c.1250-1650: land lordship and settlement. Four Courts Press Dublin, 207-222
2011	Lairg B	= JAM-6	4774-4677 BC	W	-4725.5	6726	6676	48.5	Torfajökull	Germany	Grambow	53.5973	11.2773	peatland	Rhyolitic	van den Bogaard and Schmincke (2002) Journal of Quaternary Science 17, 3-20, van den Bogaard et al. (2002) Quaternary Research 57, 314-324
2011	Lairg B	= JAM-6	4774-4677 BC	W	-4725.5	6726	6676	48.5	Torfajökull	Germany	Jardelunde	54.822	9.2397	peatland	Rhyolitic	van den Bogaard and Schmincke (2002) Journal of Quaternary Science 17, 3-20, van den Bogaard et al. (2002) Quaternary Research 57, 314-324
2011	Lairg B		4774-4677 BC	W	-4725.5	6726	6676	48.5	Torfajökull	Great Britain	Lairg	57.98	-4.39	peatland	Rhyolitic	Dugmore et al. (1995) The Holocene 5, 257-266
2015	Lairg B		4774-4677 BC	W	-4725.5	6726	6676	48.5	Torfajökull	Great Britain	Malham Tarn Moss	54.097	-2.173	peatland	Rhyolitic	Watson et al. (2016) Quaternary Science Reviews 139, 110-128
2011	Lairg B		4774-4677 BC	W	-4725.5	6726	6676	48.5	Torfajökull	Ireland	Owenduff	53.9643	-9.6915	peatland	Rhyolitic	Plunkett (2006) Journal of Quaternary Science 21, 9-16; Plunkett (1999) Environmental change in the Late Bronze Age in Ireland (1200-600 cal. BC). PhD thesis, Queen's University Belfast
2014	Lairg B		4774-4677 BC	W	-4725.5	6726	6676	48.5	Torfajökull	Great Britain	Ricksy Ball	51.1278	-3.84334	peatland	Rhyolitic	Fyfe et al. (2014) South West Water Report: http://www.southwestwater.co.uk/media/pdf/5/5/Vegetation_and_climate_change_on_Exmoor_Fyfe_et_al_2014.pdf.
2011	Lairg B		4774-4677 BC	W	-4725.5	6726	6676	48.5	Torfajökull	Ireland	Sluggan	54.7667	-6.2833	peatland	Rhyolitic	Hall (2003) The Holocene 13, 131-138; Hall and Pilcher (2002) The Holocene 12, 223-230; Pilcher et al. (1996) Journal of Quaternary Science 11, 485-494
2016	Lairg B		4774-4677 BC	W	-4725.5	6726	6676	48.5	Torfajökull	Germany	Tiefer See	53.5929	12.5289	lake	Rhyolitic	Wulf et al. (2016) Quaternary Science Reviews 132, 1-14
2011	Lairg A		4997-4902 BC	W	-4949.5	6950	6900	47.5	Hekla	Ireland	An Loch Mór	53.0667	-9.5056	lake	Rhyolitic	Chambers et al. (2004) The Holocene 14, 703-720
2011	Lairg A		4997-4902 BC	W	-4949.5	6950	6900	47.5	Hekla	Ireland	Ballynahone	54.7833	-6.63333	peatland	Rhyolitic	Pilcher et al. (1996) Journal of Quaternary Science 11, 485-494; Holmes (1998) A tephra-dated study of vegetation and climate change in the mid-Holocene of north-west Europe. PhD thesis, Queen's University Belfast; Hall and Pilcher (2002) The Holocene 12, 223-230; Swindles (unpublished data)
2011	Lairg A	(= Hekla 5?)	4997-4902 BC	W	-4949.5	6950	6900	47.5	Hekla	Scandinavia	Borge	68.2467	13.7417	peatland	Rhyolitic	Pilcher et al. (2005) Boreas 34, 136-156
2015	Lairg A		4997-4902 BC	W	-4949.5	6950	6900	47.5	Hekla	Ireland	Claraghmore	54.6309	-7.458	peatland	Rhyolitic	Watson et al (2016) Quaternary Science Reviews 139, 110-128
2015	Lairg A		4997-4902 BC	W	-4949.5	6950	6900	47.5	Hekla	Ireland	Claraghmore lough	54.631	-7.45	lake	Rhyolitic	Watson et al (2016) Quaternary Science Reviews 139, 110-128
2015	Lairg A		4997-4902 BC	W	-4949.5	6950	6900	47.5	Hekla	Scandinavia	Degerö Stormyr	64.181	19.564	peatland	Rhyolitic	Watson et al. (2016) Quaternary Science Reviews 139, 110-128
2011	Lairg A		4997-4902 BC	W	-4949.5	6950	6900	47.5	Hekla	Ireland	Fallahogy	54.75	-6.6	peatland	Rhyolitic	Hall (2003) The Holocene 13, 131-138
2011	Lairg A		4997-4902 BC	W	-4949.5	6950	6900	47.5	Hekla	Ireland	Garry Bog	55.0833	-6.5667	peatland	Rhyolitic	Hall and Pilcher (2002) The Holocene 12, 223-230; Pilcher et al. (1996) Journal of Quaternary Science 11, 485-494; Holmes (1998) A tephra-dated study of vegetation and climate change in the mid-Holocene of north-west Europe. PhD thesis, Queen's University Belfast; Plunkett (1999) Environmental change in the Late Bronze Age in Ireland (1200-600 cal. BC). PhD thesis, Queen's University Belfast
2011	Lairg A	(= Hekla 5?) = JAM-7	4997-4902 BC	W	-4949.5	6950	6900	47.5	Hekla	Germany	Grambow	53.5973	11.2773	peatland	Rhyolitic	van den Bogaard and Schmincke (2002) Journal of Quaternary Science 17, 3-20, van den Bogaard et al. (2002) Quaternary Research 57, 314-324
2011	Lairg A	(= Hekla 5?) = JAM-7	4997-4902 BC	W	-4949.5	6950	6900	47.5	Hekla	Germany	Jardelunde	54.822	9.2397	peatland	Rhyolitic	van den Bogaard and Schmincke (2002) Journal of Quaternary Science 17, 3-20, van den Bogaard et al. (2002) Quaternary Research 57, 314-324
2011	Lairg A	(= Hekla 5?)	4997-4902 BC	W	-4949.5	6950	6900	47.5	Hekla	Scandinavia	Klocka Bog	63.3083	12.4833	peatland	Rhyolitic	Bergman et al. (2004) Journal of Quaternary Science 19, 241-249
2011	Lairg A		4997-4902 BC	W	-4949.5	6950	6900	47.5	Hekla	Great Britain	Lairg	57.98	-4.39	peatland	Rhyolitic	Dugmore et al. (1995) The Holocene 5, 257-266
2015	Lairg A		4997-4902 BC	W	-4949.5	6950	6900	47.5	Hekla	Great Britain	Malham Tarn Moss	54.097	-2.173	peatland	Rhyolitic	Watson et al. (2016) Quaternary Science Reviews 139, 110-128
2011	Lairg A		4997-4902 BC	W	-4949.5	6950	6900	47.5	Hekla	Ireland	Moyreen	52.5328	-9.179	peatland	Rhyolitic	Plunkett (2006) Journal of Quaternary Science 21, 9-16; Plunkett (1999) Environmental change in the Late Bronze Age in Ireland (1200-600 cal. BC). PhD thesis, Queen's University Belfast
2014	Lairg A		4997-4902 BC	W	-4949.5	6950	6900	47.5	Hekla	Great Britain	Ricksy Ball	51.1278	-3.84334	peatland	Rhyolitic	Fyfe et al. (2014) South West Water Report: http://www.southwestwater.co.uk/media/pdf/5/5/Vegetation_and_climate_change_on_Exmoor_Fyfe_et_al_2014.pdf.
2011	Lairg A	(= Hekla 5?)	4997-4902 BC	W	-4949.5	6950	6900	47.5	Hekla	Scandinavia	Sellevoll (aka Sellevollmyra)	69.1083	15.9417	peatland	Rhyolitic	Vorren et al. (2007) Boreas 36, 253-277
2011	Lairg A		4997-4902 BC	W	-4949.5	6950	6900	47.5	Hekla	Ireland	Sluggan	54.7667	-6.2833	peatland	Rhyolitic	Hall (2003) The Holocene 13, 131-138; Hall and Pilcher (2002) The Holocene 12, 223-230; Pilcher et al. (1996) Journal of Quaternary Science 11, 485-494
2015	Lairg A?		4997-4902 BC	W	-4949.5	6950	6900	47.5	Hekla	Scandinavia	Svartkälsjärn lake	64.264	19.552	lake	Rhyolitic	Watson et al. (2016) Quaternary Science Reviews 139, 110-128
2011	Lairg A		4997-4902 BC	W	-4949.5	6950	6900	47.5	Hekla	Great Britain	Temple Hill Moss	55.8367	-3.4178	peatland	Rhyolitic	Langdon and Barber (2004) The Holocene 14, 21-33, Langdon and Barber (2005) Journal of Quaternary Science 20, 549-566
2015	CLA-L1		After AD 1000	N/A	?	?	After AD 1000		Grímsvötn?	Ireland	Claraghmore lough	54.631	-7.45	lake	Basaltic	Watson et al (2016) Quaternary Science Reviews 139, 110-128

## Sheet: Documented ash falls
Name	Reported year	Method	Mid age cal. BC/AD	Mid age cal age BP (2000)	Mid age cal BP (1950)	Source	Location	Reference
Grímsvötn 2011	2011	Documented	2011	-11	-61	Grímsvötn	United Kingdom	Stevenson et al., 2013. Journal of Applied Volcanology doi:10.1186/2191-5040-2-3
Eyjafjallajökull 2010	2010	Documented	2010	-10	-60	Eyjafjökull	Faroes, Great Britain, Ireland, Scandinavia	Davies et al (2010) Journal of Quaternary Science 25, 605-611
Hekla 1947	1947	Documented	1947	53	3	Hekla	Scandinavia (Finland)	Thorarinsson (1954) Soc. Scient. Islandica 3, 1-68
Askja 1875	1875	Documented	1875	125	75	Askja	Scandinavia	Mohn (1878) Kria. Vidensk. Selsk. Forhandlinger 1877 10, 1-12
Hekla 1845	1845	Documented	1845	155	105	Hekla	Great Britain (Orkney)	Wastegard and Davies (2009) Journal of Quaternary Science 24, 500-512
Katla 1755	1755	Documented	1755	245	195	Katla	Scandinavia, Faroes	Thorarinsson (1981) Geografiska Annaler Series A 63, 109-118
Hekla 1693	1693	Documented	1693	307	257	Hekla	No specific details	Thorarinsson (1981) Chapter in: Self and Sparks. Tephra Studies. Dordrecht: Reidel
Katla 1660	1660	Documented	1660	340	290	Katla	Faroes	Thorarinsson (1981) Geografiska Annaler Series A 63, 109-118
Katla 1625	1625	Documented	1625	375	325	Katla	Scandinavia, Faroes	Thorarinsson (1981) Geografiska Annaler Series A 63, 109-118
Grímsvötn?	1619	Documented	1619	381	331	Grímsvötn	Scandinavia	Thorarinsson (1981) Geografiska Annaler Series A 63, 109-118

## Sheet: Last 1000 years
Event	Record	Age (AD)
Grimsvotn_2011	Documented	2011
Eyjafjallajokull_2010	Documented	2010
Hekla_1947	Documented and Cryptotephra	1947
Askja_1875	Documented and Cryptotephra	1875
Hekla_1845	Documented and Cryptotephra	1845
BRACSH_1	Cryptotephra	1804
Katla_1755	Documented	1755
QUB_384_G1,G3,G4	Cryptotephra	1700
Hekla_1693	Documented and Cryptotephra	1693
Katla_1660	Documented	1660
SLU_5	Cryptotephra	1650
Katla_1625	Documented	1625
Grimsvotn_1619	Documented	1619
Hekla_1510	Cryptotephra	1510
LochPortain_b	Cryptotephra	1510
MOR_T1_Veidivotn1477	Cryptotephra	1477
PMG5_MOR-T2	Cryptotephra	1400
O_1362	Cryptotephra	1362
QUB_385_G1	Cryptotephra	1362
GB4_50	Cryptotephra	1250
Hekla_1158	Cryptotephra	1158
BGMT1	Cryptotephra	1157
Hekla_1104	Cryptotephra	1104
MOR_T4	Cryptotephra	1000
